# Supplementary material
Source: MDPI journal article supplement (https://www.mdpi.com/search?q=catalysts-09-00515)
Supplement: s001 [file catalysts-09-00515-s001.pdf]

# Supplementary Materials: Synthesis, Structure, and Catalytic Reactivity of Pd(II) Complexes of Proline and Proline Homologs

David B. Hobart, Jr., Joseph S. Merola \*, Hannah M. Rogers, Sonia Saghal, James Mitchell, Jacqueline Florio and Jeffrey W. Merola

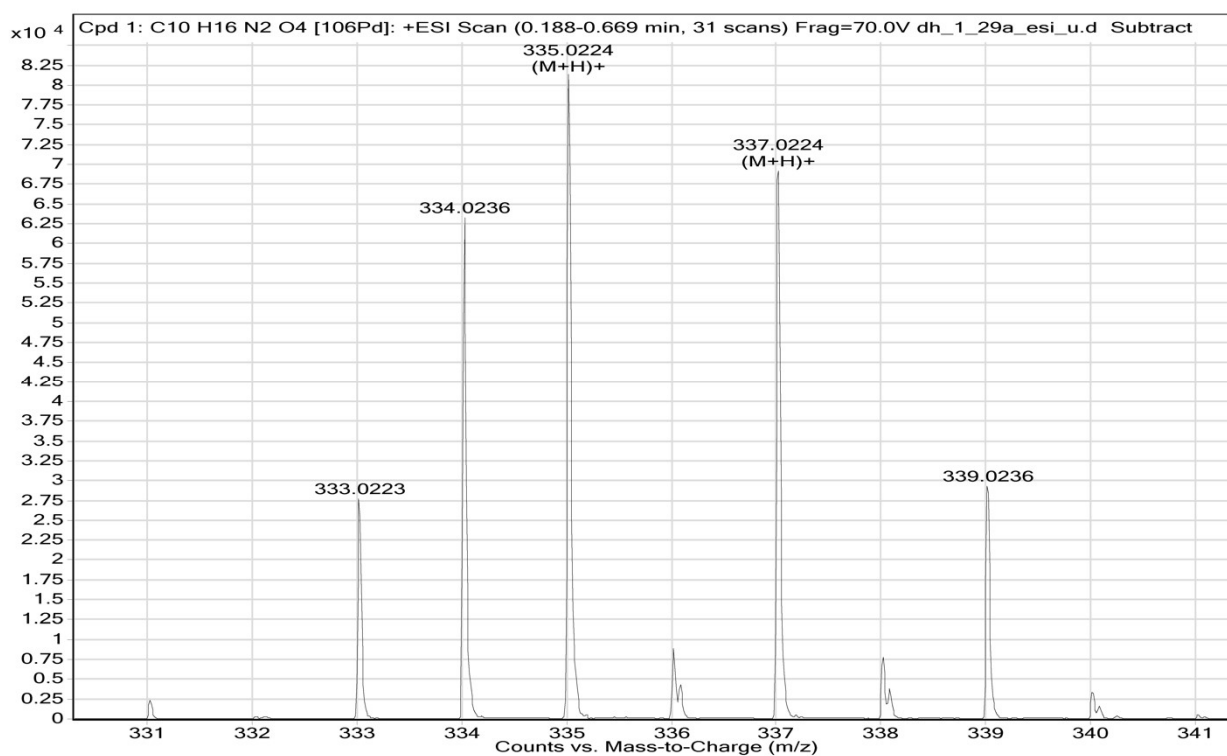

**Figure S1.** High-resolution time-of-flight mass spectrum of (**1**) as an example of the typical isotopic splitting pattern seen for palladium complexes with one Pd atom.

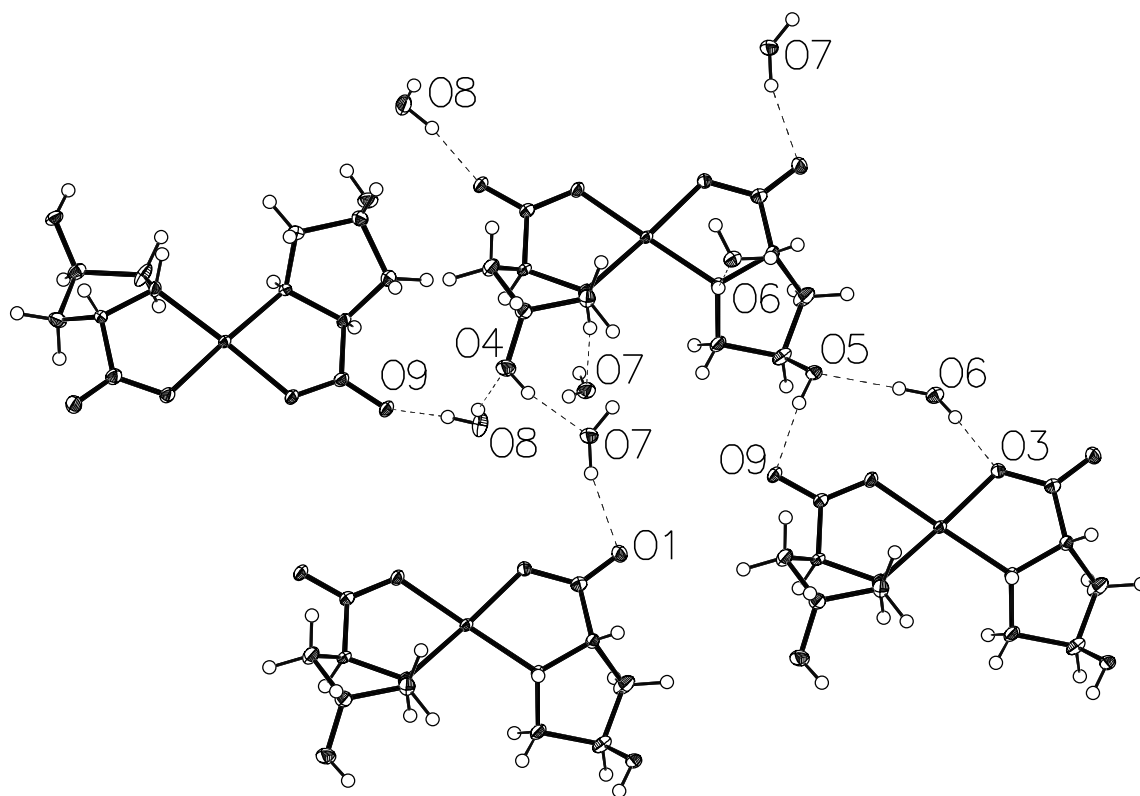

**Figure S2.** Extended hydrogen-bonding network of *cis*-bis-(*trans*-4-hydroxyprolinato)palladium(II) (3).

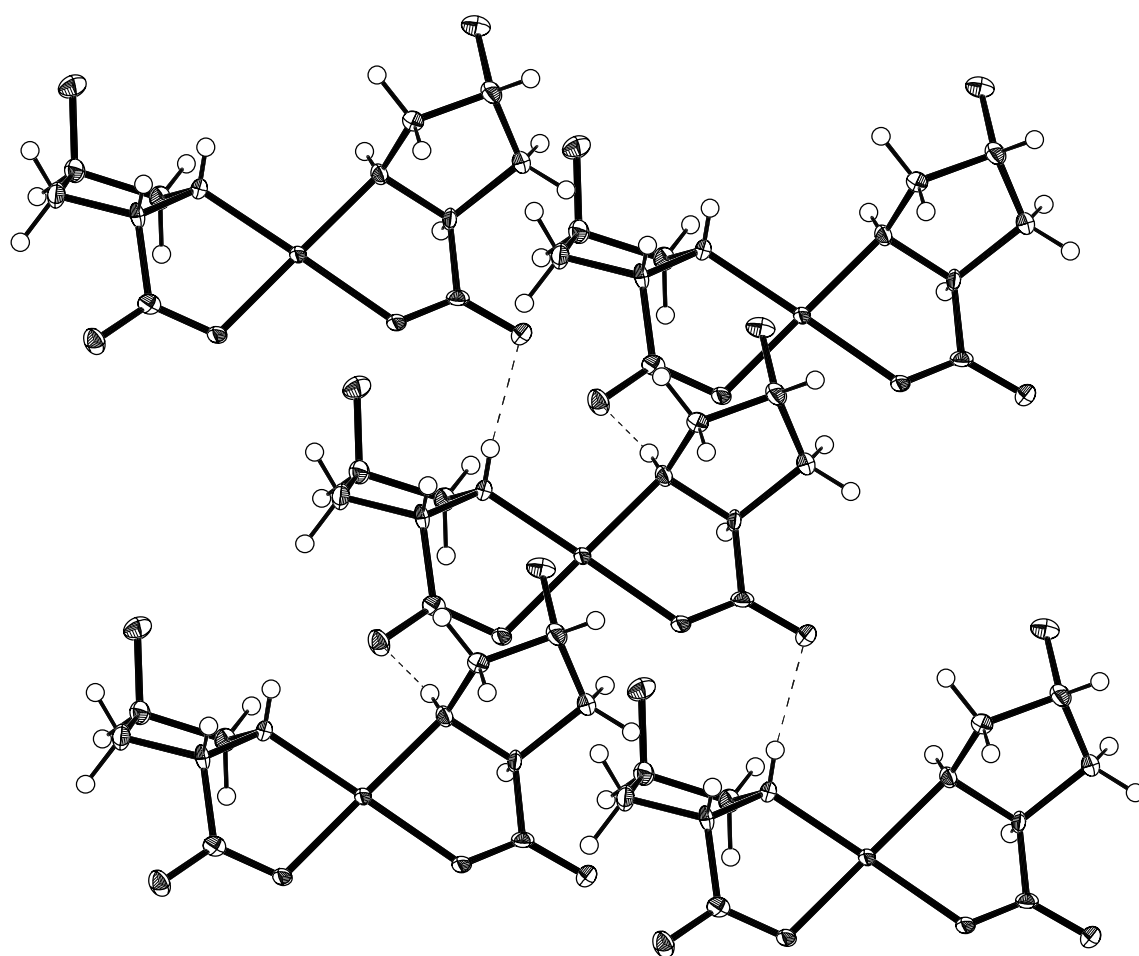

**Figure S3.** Crystal packing diagram of *cis*-bis-(*trans*-4-fluoroprolinato)palladium(II) (**4**) showing hydrogen bonding network.

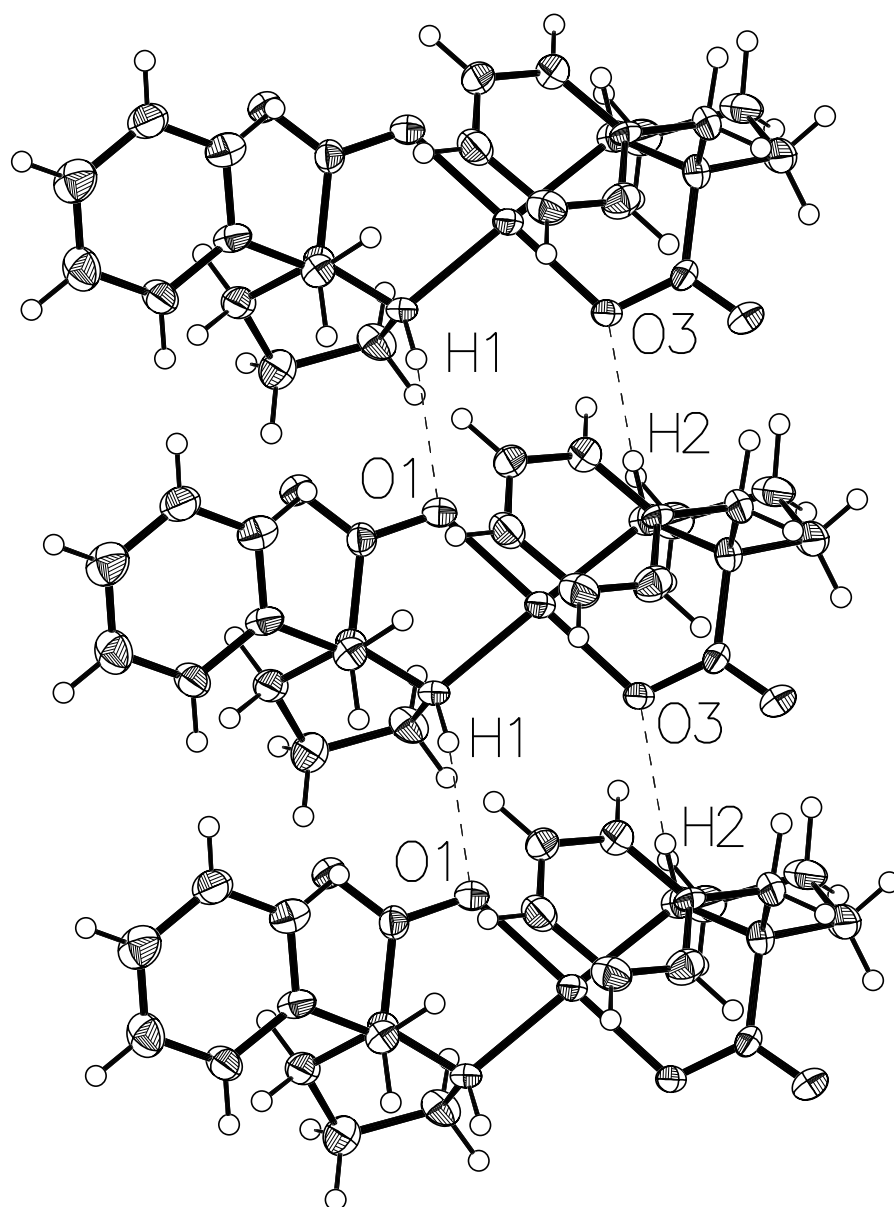

**Figure S4.** Crystal packing diagram of *trans*-bis-(2-benzylprolinato)palladium(II), (**5**) showing the hydrogen bonding network.

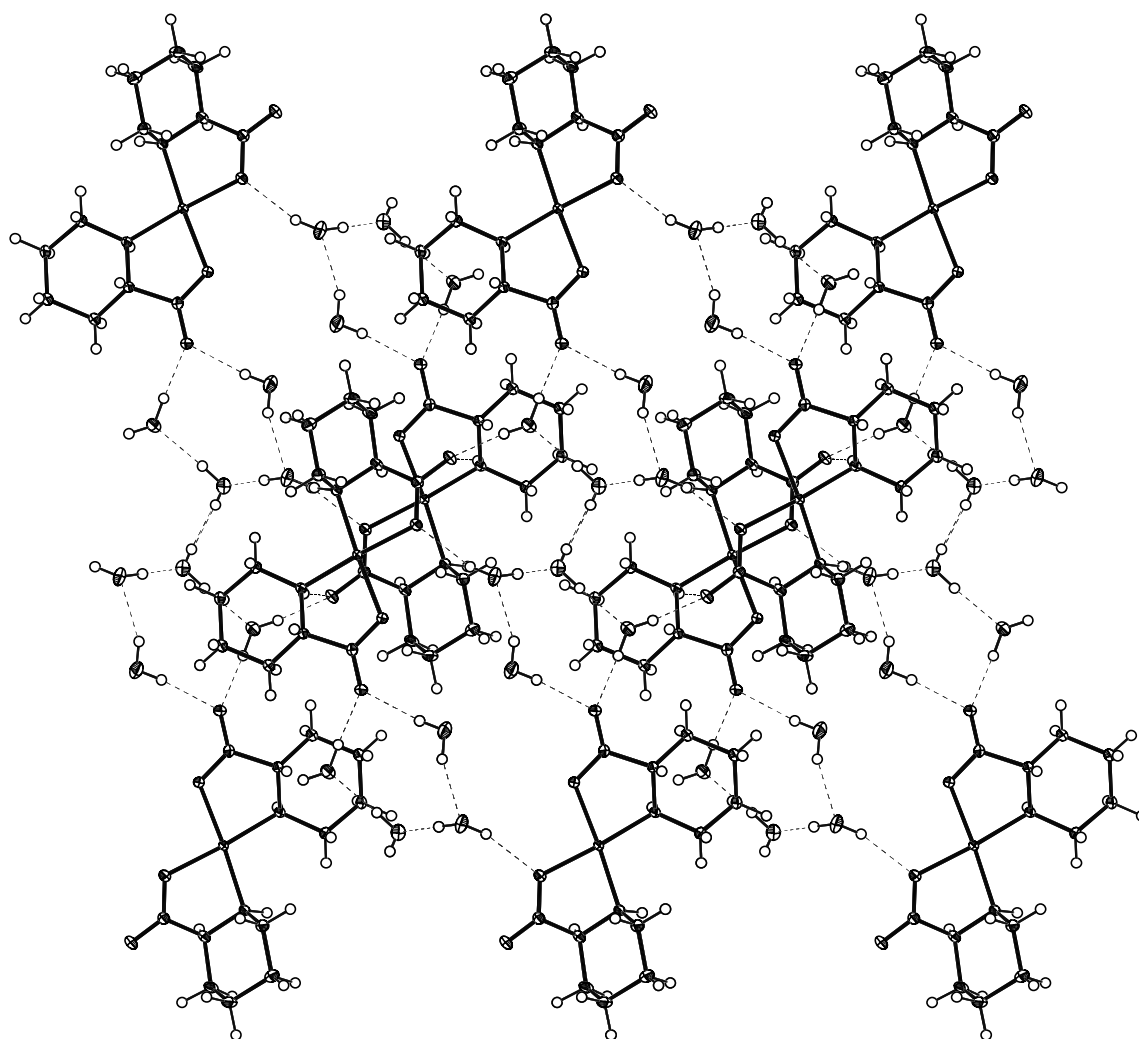

**Figure S5.** Packing diagram of *cis*-bis-(L-pipecolinato)palladium(II) (Z) as viewed along [010] showing the hydrogen bonding network.

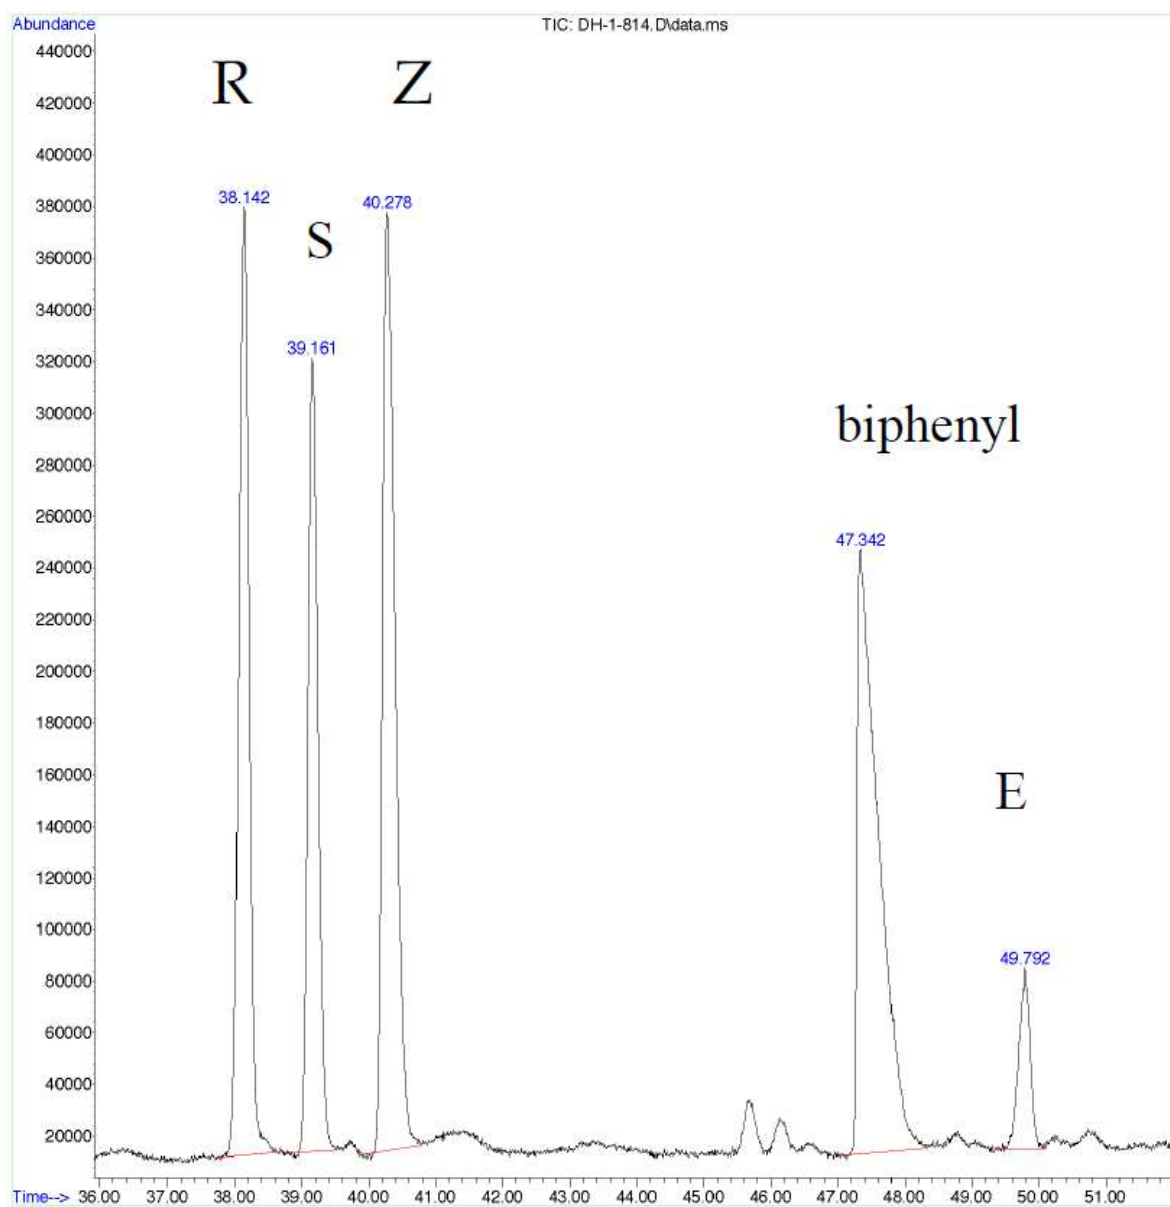

**Figure 6.** Typical GC-MS trace of the oxidative coupling of phenylboronic acid with methyl tiglate. Peaks R, S, Z, E have masses of 190.2 amu.

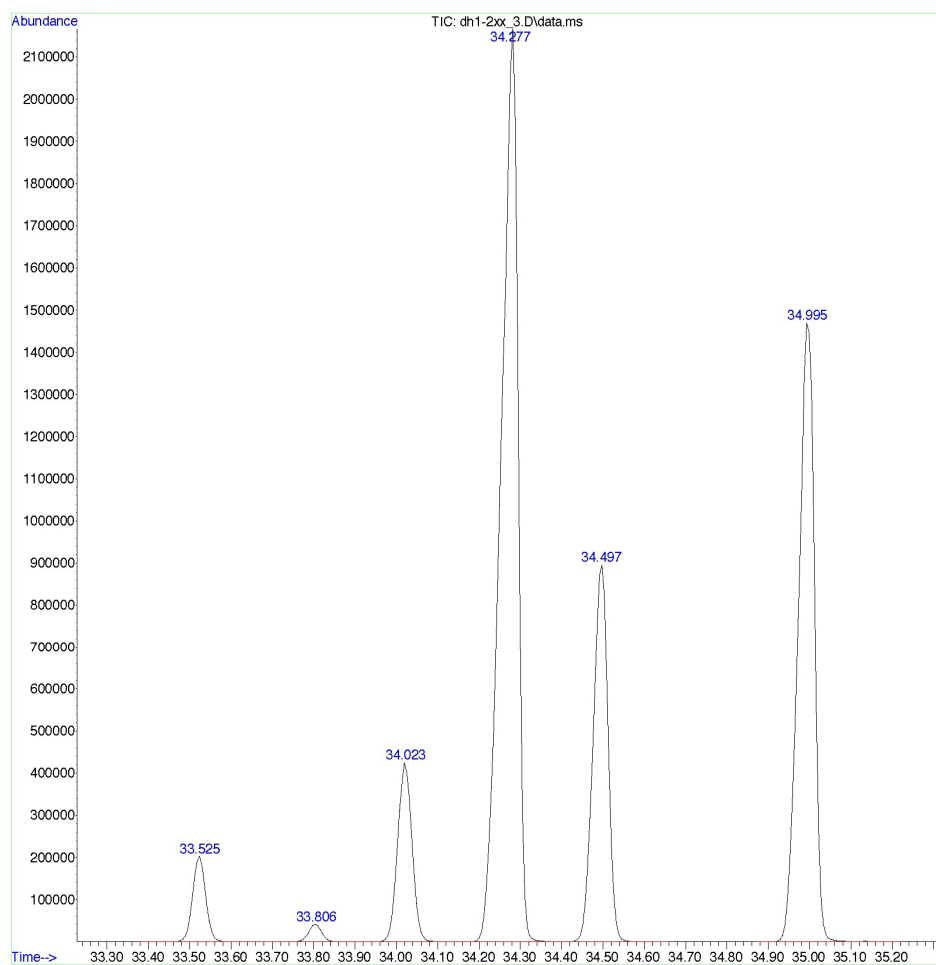

**Figure S7.** Typical GC-MS trace of the second oxidative coupling products of phenylboronic acid with methyl tiglate. Peaks shown have masses of 266.3 amu.

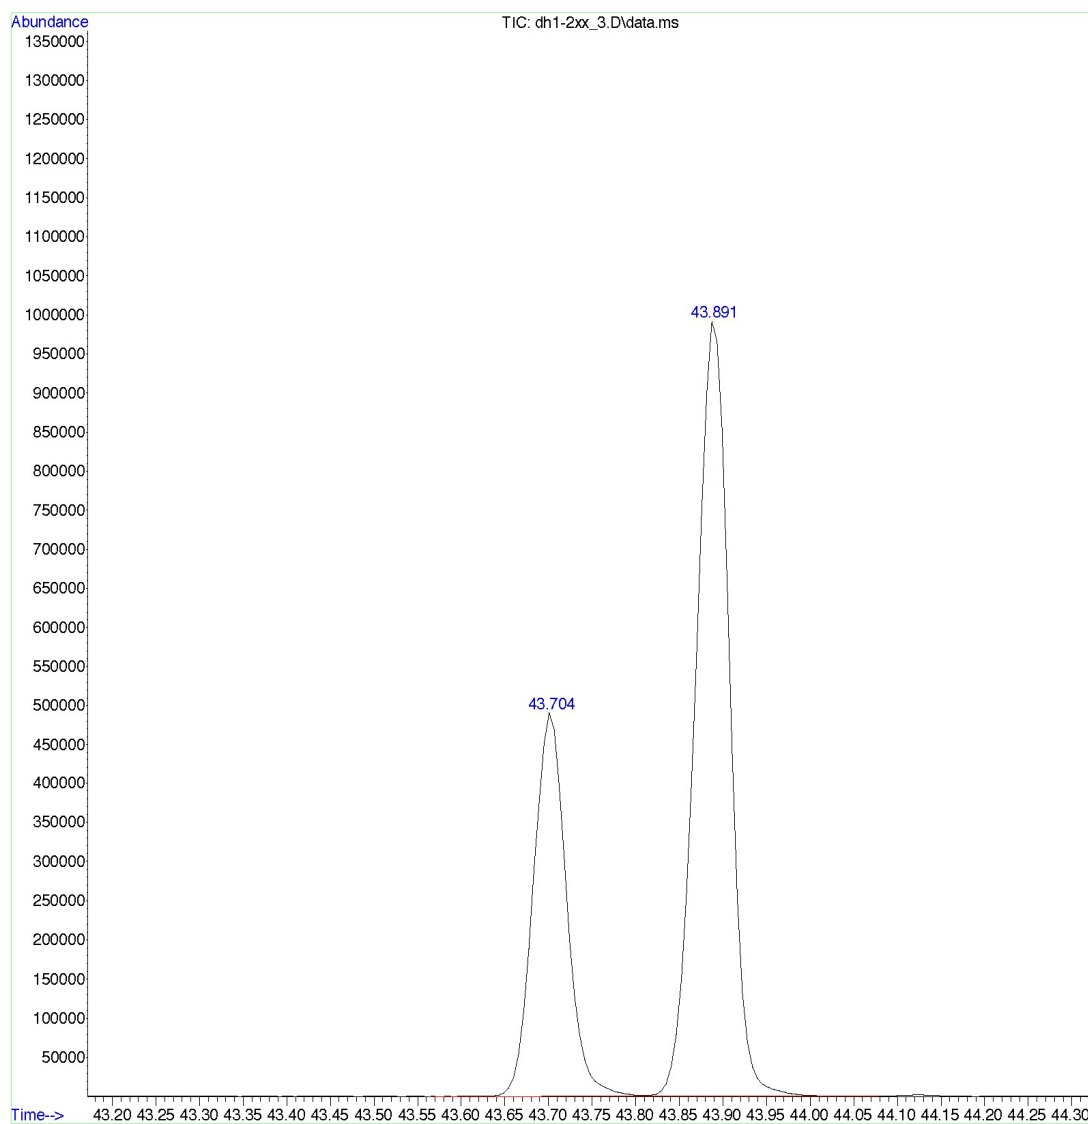

**Figure 8.** Typical GC-MS trace of the third oxidative coupling products of phenylboronic acid with methyl tiglate. Peaks shown have masses of 342.4 amu.

### Report I. Experimental Details and Bond Lengths and Angles for Complex 1.

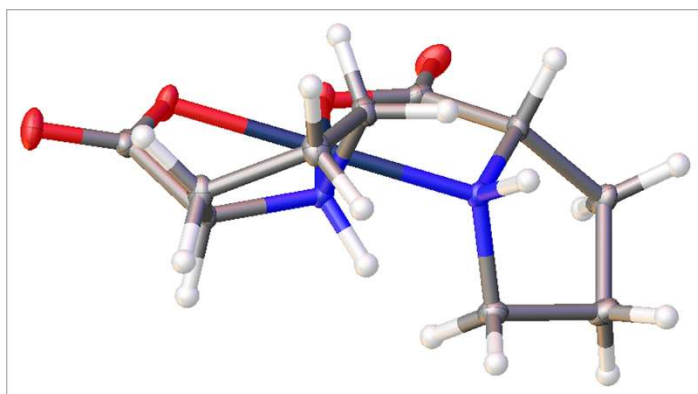

**Table 1.** data and structure refinement for Complex 1.



|                                             |                                                                  |
|---------------------------------------------|------------------------------------------------------------------|
| Identification code                         | dh1-29a_ABS                                                      |
| Empirical formula                           | C <sub>10</sub> H <sub>16</sub> N <sub>2</sub> O <sub>4</sub> Pd |
| Formula weight                              | 334.65                                                           |
| Temperature/K                               | 100.15                                                           |
| Crystal system                              | orthorhombic                                                     |
| Space group                                 | C222 <sub>1</sub>                                                |
| a/Å                                         | 9.66974(11)                                                      |
| b/Å                                         | 10.31486(12)                                                     |
| c/Å                                         | 11.94805(14)                                                     |
| α/°                                         | 90                                                               |
| β/°                                         | 90                                                               |
| γ/°                                         | 90                                                               |
| Volume/Å <sup>3</sup>                       | 1191.72(2)                                                       |
| Z                                           | 4                                                                |
| ρ <sub>calc</sub> /cm <sup>3</sup>          | 1.865                                                            |
| μ/mm <sup>-1</sup>                          | 1.562                                                            |
| F(000)                                      | 672.0                                                            |
| Crystal size/mm <sup>3</sup>                | 0.4713 × 0.2226 × 0.1011                                         |
| Radiation                                   | MoKα (λ = 0.71073)                                               |
| 2θ range for data collection/°              | 6.708 to 64.746                                                  |
| Index ranges                                | -14 ≤ h ≤ 14, -15 ≤ k ≤ 15, -17 ≤ l ≤ 17                         |
| Reflections collected                       | 16692                                                            |
| Independent reflections                     | 2100 [R <sub>int</sub> = 0.0322, R <sub>sigma</sub> = 0.0196]    |
| Data/restraints/parameters                  | 2100/0/78                                                        |
| Goodness-of-fit on F <sup>2</sup>           | 1.086                                                            |
| Final R indexes [I ≥ 2σ (I)]                | R <sub>1</sub> = 0.0167, wR <sub>2</sub> = 0.0361                |
| Final R indexes [all data]                  | R <sub>1</sub> = 0.0182, wR <sub>2</sub> = 0.0365                |
| Largest diff. peak/hole / e Å <sup>-3</sup> | 0.54/-0.33                                                       |
| Flack parameter                             | -0.004(14)                                                       |

**Table 2.** Fractional Atomic Coordinates ( $\times 10^4$ ) and Equivalent Isotropic Displacement Parameters ( $\text{\AA}^2 \times 10^3$ ) for dh1-29a\_ABS, Complex 1.  $U_{eq}$  is defined as 1/3 of of the trace of the orthogonalised  $U_{ij}$  tensor.

| Atom | <i>x</i>   | <i>y</i>   | <i>z</i>   | $U_{eq}$ |
|------|------------|------------|------------|----------|
| Pd1  | 5000       | 4385.9(2)  | 2500       | 9.26(5)  |
| O1   | 3567.7(16) | 5692.2(15) | 2990.1(14) | 14.7(3)  |
| O2   | 1331.1(17) | 5877.0(15) | 3381.6(14) | 17.2(3)  |
| N1   | 3556.5(17) | 3112.3(17) | 3008.2(14) | 9.6(3)   |
| C1   | 2346(2)    | 5211(2)    | 3144.5(18) | 12.3(4)  |
| C2   | 2167(2)    | 3752.6(19) | 2960.9(18) | 10.0(3)  |
| C3   | 1263(2)    | 3086(2)    | 3854.6(17) | 13.5(4)  |
| C4   | 2235(2)    | 2138(2)    | 4460.3(19) | 14.6(4)  |
| C5   | 3683(2)    | 2646(2)    | 4190.9(17) | 13.3(4)  |

**Table 3** Anisotropic Displacement Parameters ( $\text{\AA}^2 \times 10^3$ ) for dh1-29a\_ABS, Complex 1. The Anisotropic displacement factor exponent takes the form:  $-2\pi^2[h^2a^2U_{11}+2hka^*b^*U_{12}+...]$ .

| Atom | $U_{11}$ | $U_{22}$ | $U_{33}$ | $U_{23}$ | $U_{13}$ | $U_{12}$ |
|------|----------|----------|----------|----------|----------|----------|
| Pd1  | 7.72(8)  | 6.55(7)  | 13.50(8) | 0        | 1.26(12) | 0        |
| O1   | 12.2(6)  | 8.8(6)   | 23.2(7)  | -1.0(6)  | 3.8(6)   | 1.7(6)   |
| O2   | 15.3(7)  | 13.1(7)  | 23.2(8)  | 3.5(6)   | 5.8(7)   | 5.9(6)   |
| N1   | 9.1(7)   | 8.2(7)   | 11.3(7)  | -0.9(6)  | 1.1(6)   | 0.5(6)   |
| C1   | 15.4(9)  | 10.5(8)  | 10.9(9)  | 1.6(7)   | 0.0(7)   | 1.6(7)   |
| C2   | 7.2(8)   | 10.1(9)  | 12.7(8)  | 0.2(7)   | 0.6(7)   | 0.1(7)   |
| C3   | 10.3(8)  | 13.5(9)  | 16.9(9)  | 2.9(8)   | 4.2(7)   | 0.9(8)   |
| C4   | 14.0(9)  | 15.8(10) | 14.1(9)  | 4.7(8)   | 3.5(8)   | 1.4(8)   |
| C5   | 12.5(9)  | 14.9(9)  | 12.6(9)  | 2.1(7)   | -0.1(8)  | 2.3(8)   |

**Table 4 Bond Lengths for dh1-29a\_ABS, Complex 1**

| Atom | Atom            | Length/Å   | Atom | Atom | Length/Å |
|------|-----------------|------------|------|------|----------|
| Pd1  | O1 <sup>1</sup> | 2.0191(15) | N1   | C2   | 1.498(3) |
| Pd1  | O1              | 2.0191(15) | N1   | C5   | 1.498(3) |
| Pd1  | N1 <sup>1</sup> | 2.0107(17) | C1   | C2   | 1.530(3) |
| Pd1  | N1              | 2.0107(17) | C2   | C3   | 1.542(3) |
| O1   | C1              | 1.295(3)   | C3   | C4   | 1.537(3) |
| O2   | C1              | 1.231(3)   | C4   | C5   | 1.530(3) |

<sup>1</sup>1-X,+Y,1/2-Z.**Table 5 Bond Angles for dh1-29a\_ABS, Complex 1.**

| Atom            | Atom | Atom            | Angle/°    | Atom | Atom | Atom | Angle/°    |
|-----------------|------|-----------------|------------|------|------|------|------------|
| O1 <sup>1</sup> | Pd1  | O1              | 96.28(9)   | O1   | C1   | C2   | 117.37(18) |
| N1 <sup>1</sup> | Pd1  | O1              | 178.84(7)  | O2   | C1   | O1   | 123.1(2)   |
| N1 <sup>1</sup> | Pd1  | O1 <sup>1</sup> | 82.66(6)   | O2   | C1   | C2   | 119.5(2)   |
| N1              | Pd1  | O1 <sup>1</sup> | 178.84(7)  | N1   | C2   | C1   | 109.08(17) |
| N1              | Pd1  | O1              | 82.66(6)   | N1   | C2   | C3   | 106.60(16) |
| N1 <sup>1</sup> | Pd1  | N1              | 98.41(10)  | C1   | C2   | C3   | 113.77(18) |
| C1              | O1   | Pd1             | 114.28(13) | C4   | C3   | C2   | 105.27(16) |
| C2              | N1   | Pd1             | 108.85(12) | C5   | C4   | C3   | 104.06(17) |
| C5              | N1   | Pd1             | 115.98(13) | N1   | C5   | C4   | 103.51(17) |
| C5              | N1   | C2              | 104.52(15) |      |      |      |            |

<sup>1</sup>1-X,+Y,1/2-Z**Table 6 Hydrogen Atom Coordinates (Å×10<sup>4</sup>) and Isotropic Displacement Parameters (Å<sup>2</sup>×10<sup>3</sup>) for dh1-29a\_ABS, Complex 1.**

| Atom | x    | y    | z    | U(eq) |
|------|------|------|------|-------|
| H1   | 3560 | 2348 | 2493 | 11    |
| H2   | 1751 | 3602 | 2206 | 12    |
| H3A  | 884  | 3732 | 4385 | 16    |
| H3B  | 486  | 2615 | 3500 | 16    |
| H4A  | 2064 | 2146 | 5277 | 18    |
| H4B  | 2111 | 1244 | 4176 | 18    |
| H5A  | 3943 | 3363 | 4699 | 16    |
| H5B  | 4381 | 1947 | 4252 | 16    |

## Experimental

Single crystals of Complex 1,  $C_{10}H_{16}N_2O_4Pd$  [dh1-29a\_ABS] were [crystallized from acetone/water]. A suitable crystal was selected and [mounted on a fiber loop.] on a Oxford Diffraction Gemini Ultra diffractometer. The crystal was kept at 100.15 K during data collection. Using Olex2 [1], the structure was solved with the ShelXS-1997 [2] structure solution program using Direct Methods and refined with the ShelXL-1997 [3] refinement package using Least Squares minimisation.

1. Dolomanov, O.V., Bourhis, L.J., Gildea, R.J., Howard, J.A.K. & Puschmann, H. (2009), J. Appl. Cryst. 42, 339-341.
2. Sheldrick, G.M. (2008). Acta Cryst. A64, 112-122.
3. Sheldrick, G.M. (2008). Acta Cryst. A64, 112-122.

**Crystal Data** for  $C_{10}H_{16}N_2O_4Pd$  ( $M = 334.65$  g/mol): orthorhombic, space group  $C222_1$  (no. 20),  $a = 9.66974(11)$  Å,  $b = 10.31486(12)$  Å,  $c = 11.94805(14)$  Å,  $V = 1191.72(2)$  Å<sup>3</sup>,  $Z = 4$ ,  $T = 100.15$  K,  $\mu(MoK\alpha) = 1.562$  mm<sup>-1</sup>,  $D_{calc} = 1.865$  g/cm<sup>3</sup>, 16692 reflections measured ( $6.708^\circ \leq 2\theta \leq 64.746^\circ$ ), 2100 unique ( $R_{int} = 0.0322$ ,  $R_{\sigma} = 0.0196$ ) which were used in all calculations. The final  $R_1$  was 0.0167 ( $I > 2\sigma(I)$ ) and  $wR_2$  was 0.0365 (all data).

## Refinement model description

Number of restraints - 0, number of constraints - unknown.

Details:

1. Fixed Uiso  
At 1.2 times of:  
All C(H) groups, All C(H,H) groups, All N(H) groups
- 2.a Ternary CH refined with riding coordinates:  
N1(H1), C2(H2)
- 2.b Secondary CH2 refined with riding coordinates:  
C3(H3A,H3B), C4(H4A,H4B), C5(H5A,H5B)

## Report II. Experimental Details and Bond Lengths and Angles for Complex 2.

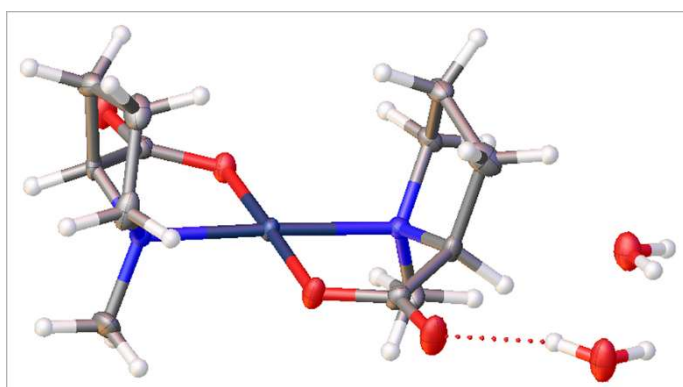

**Table 1** Crystal data and structure refinement for Complex 2.

|                     |                        |
|---------------------|------------------------|
| Identification code | dh1-43a_ABS            |
| Empirical formula   | $C_{12}H_{24}N_2O_6Pd$ |
| Formula weight      | 398.73                 |

|                                             |                                                               |
|---------------------------------------------|---------------------------------------------------------------|
| Temperature/K                               | 100.15                                                        |
| Crystal system                              | orthorhombic                                                  |
| Space group                                 | P2 <sub>1</sub> 2 <sub>1</sub> 2 <sub>1</sub>                 |
| a/Å                                         | 8.69102(15)                                                   |
| b/Å                                         | 9.8633(3)                                                     |
| c/Å                                         | 18.4039(3)                                                    |
| $\alpha$ /°                                 | 90                                                            |
| $\beta$ /°                                  | 90                                                            |
| $\gamma$ /°                                 | 90                                                            |
| Volume/Å <sup>3</sup>                       | 1577.61(6)                                                    |
| Z                                           | 4                                                             |
| $\rho_{\text{calc}}/\text{cm}^{-3}$         | 1.679                                                         |
| $\mu/\text{mm}^{-1}$                        | 1.204                                                         |
| F(000)                                      | 816.0                                                         |
| Crystal size/mm <sup>3</sup>                | 0.3314 × 0.2354 × 0.1667                                      |
| Radiation                                   | MoK $\alpha$ ( $\lambda$ = 0.71073)                           |
| 2 $\Theta$ range for data collection/°      | 7.66 to 55.398                                                |
| Index ranges                                | -10 ≤ h ≤ 11, -12 ≤ k ≤ 12, -22 ≤ l ≤ 24                      |
| Reflections collected                       | 8854                                                          |
| Independent reflections                     | 3219 [R <sub>int</sub> = 0.0293, R <sub>sigma</sub> = 0.0361] |
| Data/restraints/parameters                  | 3219/0/198                                                    |
| Goodness-of-fit on F <sup>2</sup>           | 1.033                                                         |
| Final R indexes [I ≥ 2 $\sigma$ (I)]        | R <sub>1</sub> = 0.0228, wR <sub>2</sub> = 0.0448             |
| Final R indexes [all data]                  | R <sub>1</sub> = 0.0258, wR <sub>2</sub> = 0.0462             |
| Largest diff. peak/hole / e Å <sup>-3</sup> | 0.33/-0.31                                                    |
| Flack parameter                             | -0.016(19)                                                    |

**Table 2.** Fractional Atomic Coordinates ( $\times 10^4$ ) and Equivalent Isotropic Displacement Parameters ( $\text{\AA}^2 \times 10^3$ ) for dh1-43a\_ABS, Complex 2.  $U_{\text{eq}}$  is defined as 1/3 of the trace of the orthogonalised  $U_{ij}$  tensor.

| Atom | x        | y         | z          | U(eq)    |
|------|----------|-----------|------------|----------|
| Pd1  | 102.3(3) | 5549.1(3) | 6272.4(2)  | 12.49(8) |
| O1   | 1046(2)  | 5564(3)   | 7263.7(12) | 17.1(6)  |
| O2   | 475(3)   | 5611(3)   | 8439.1(12) | 23.6(6)  |
| O3   | -854(3)  | 5574(3)   | 5290.1(12) | 20.5(6)  |
| O4   | -390(3)  | 5254(3)   | 4120.7(12) | 30.0(7)  |
| O5   | 801(3)   | 4556(4)   | 2764.1(13) | 31.1(7)  |

|     |          |         |            |          |
|-----|----------|---------|------------|----------|
| O6  | 5907(3)  | 5312(3) | 4724.7(14) | 26.9(7)  |
| N1  | -1906(3) | 5895(3) | 6827.0(15) | 13.8(7)  |
| N2  | 2120(3)  | 5277(3) | 5708.2(15) | 13.4(7)  |
| C1  | 66(4)    | 5581(3) | 7800.2(15) | 14.8(7)  |
| C2  | -1632(4) | 5462(4) | 7600.7(17) | 13.3(7)  |
| C3  | -2202(4) | 3981(4) | 7647(2)    | 19.8(9)  |
| C4  | -2766(5) | 3635(4) | 6880(2)    | 24.4(10) |
| C5  | -3174(4) | 5001(4) | 6564.5(19) | 22.5(10) |
| C6  | -2330(5) | 7348(4) | 6769(2)    | 27.0(10) |
| C7  | 48(5)    | 5267(3) | 4755.9(16) | 17.2(8)  |
| C8  | 1681(4)  | 4834(4) | 4946.1(18) | 16.0(8)  |
| C9  | 1866(5)  | 3278(4) | 4939(2)    | 26.6(10) |
| C10 | 2249(4)  | 2889(4) | 5725(2)    | 19.9(9)  |
| C11 | 3077(4)  | 4146(4) | 6000.2(19) | 16.3(8)  |
| C12 | 2965(4)  | 6585(4) | 5715(2)    | 23.7(9)  |

**Table 3** Anisotropic Displacement Parameters ( $\text{\AA}^2 \times 10^3$ ) for dh1-43a\_ABS, Complex 2. The Anisotropic displacement factor exponent takes the form:  $-2\pi^2[h^2a^2U_{11}+2hka^*b^*U_{12}+\dots]$ .

| Atom | $U_{11}$ | $U_{22}$  | $U_{33}$  | $U_{23}$ | $U_{13}$ | $U_{12}$ |
|------|----------|-----------|-----------|----------|----------|----------|
| Pd1  | 9.95(12) | 16.22(15) | 11.30(11) | 0.84(10) | 1.02(12) | 0.45(13) |
| O1   | 11.9(12) | 24.6(16)  | 14.9(12)  | -2.2(13) | -0.6(10) | -0.2(13) |
| O2   | 18.1(13) | 38.5(18)  | 14.0(11)  | -2.3(12) | -2.1(9)  | 0.8(14)  |
| O3   | 12.7(12) | 35.3(18)  | 13.6(11)  | 4.0(13)  | 0.1(10)  | 4.8(14)  |
| O4   | 21.9(14) | 53(2)     | 15.1(12)  | 1.5(12)  | -1.4(11) | 9.2(14)  |
| O5   | 16.9(13) | 57(2)     | 19.9(13)  | -2.5(15) | -1.1(11) | 7.7(16)  |
| O6   | 17.0(14) | 39(2)     | 24.8(13)  | -5.2(14) | -0.4(11) | 2.2(15)  |
| N1   | 11.9(15) | 16(2)     | 13.7(13)  | 2.0(12)  | 0.6(12)  | 2.5(13)  |
| N2   | 13.3(15) | 12.5(19)  | 14.4(13)  | -0.4(12) | 0.1(12)  | 0.3(13)  |
| C1   | 15.4(17) | 13.6(18)  | 15.3(13)  | -0.5(13) | -0.1(15) | -1(3)    |
| C2   | 11.6(16) | 19(2)     | 9.8(15)   | -3.8(16) | 2.7(13)  | 0.2(18)  |
| C3   | 15.6(19) | 18(2)     | 25.3(19)  | 4.9(16)  | 1.1(16)  | 0.6(16)  |
| C4   | 20(2)    | 24(3)     | 29(2)     | -7.8(18) | 4.2(18)  | -8.7(18) |
| C5   | 11.8(18) | 42(3)     | 14.1(17)  | -4.1(16) | -1.9(15) | -5.8(17) |
| C6   | 22(2)    | 25(3)     | 34(2)     | 7.3(19)  | 5.6(18)  | 12(2)    |
| C7   | 13.6(17) | 22(2)     | 16.1(15)  | 5.1(13)  | -0.5(16) | 1(2)     |
| C8   | 14.2(18) | 23(2)     | 11.0(16)  | 0.6(15)  | 2.1(14)  | 2.3(17)  |

|     |          |       |          |          |          |          |
|-----|----------|-------|----------|----------|----------|----------|
| C9  | 28(2)    | 24(3) | 27(2)    | -9.8(19) | -9.9(18) | 3(2)     |
| C10 | 18(2)    | 14(2) | 28(2)    | 2.1(16)  | 4.3(17)  | -1.4(17) |
| C11 | 15.5(18) | 15(2) | 18.1(17) | -2.1(15) | -2.0(14) | 4.0(16)  |
| C12 | 20(2)    | 16(2) | 35(2)    | -3.1(19) | 8.8(18)  | -3.1(19) |

**Table 4 Bond Lengths for dh1-43a\_ABS, Complex 2.**

| Atom | Atom | Length/Å | Atom | Atom | Length/Å |
|------|------|----------|------|------|----------|
| Pd1  | O1   | 2.000(2) | N2   | C8   | 1.518(4) |
| Pd1  | O3   | 1.990(2) | N2   | C11  | 1.491(4) |
| Pd1  | N1   | 2.051(3) | N2   | C12  | 1.485(5) |
| Pd1  | N2   | 2.055(3) | C1   | C2   | 1.525(5) |
| O1   | C1   | 1.304(4) | C2   | C3   | 1.544(5) |
| O2   | C1   | 1.229(4) | C3   | C4   | 1.533(5) |
| O3   | C7   | 1.293(4) | C4   | C5   | 1.509(6) |
| O4   | C7   | 1.230(4) | C7   | C8   | 1.523(5) |
| N1   | C2   | 1.506(4) | C8   | C9   | 1.542(6) |
| N1   | C5   | 1.491(5) | C9   | C10  | 1.533(5) |
| N1   | C6   | 1.484(5) | C10  | C11  | 1.521(5) |

**Table 5 Bond Angles for dh1-43a\_ABS, Complex 2.**

| Atom | Atom | Atom | Angle/°    | Atom | Atom | Atom | Angle/°  |
|------|------|------|------------|------|------|------|----------|
| O1   | Pd1  | N1   | 83.90(10)  | C12  | N2   | C11  | 111.8(3) |
| O1   | Pd1  | N2   | 96.44(10)  | O1   | C1   | C2   | 116.6(3) |
| O3   | Pd1  | O1   | 178.76(13) | O2   | C1   | O1   | 122.4(3) |
| O3   | Pd1  | N1   | 95.42(10)  | O2   | C1   | C2   | 120.8(3) |
| O3   | Pd1  | N2   | 84.20(10)  | N1   | C2   | C1   | 111.0(3) |
| N1   | Pd1  | N2   | 177.91(12) | N1   | C2   | C3   | 105.6(3) |
| C1   | O1   | Pd1  | 115.0(2)   | C1   | C2   | C3   | 111.7(3) |
| C7   | O3   | Pd1  | 115.7(2)   | C4   | C3   | C2   | 105.2(3) |
| C2   | N1   | Pd1  | 106.8(2)   | C5   | C4   | C3   | 103.3(3) |
| C5   | N1   | Pd1  | 111.7(2)   | N1   | C5   | C4   | 103.3(3) |
| C5   | N1   | C2   | 104.8(3)   | O3   | C7   | C8   | 117.1(3) |
| C6   | N1   | Pd1  | 109.6(2)   | O4   | C7   | O3   | 122.5(4) |
| C6   | N1   | C2   | 112.4(3)   | O4   | C7   | C8   | 120.3(3) |

|     |    |     |          |     |     |     |          |
|-----|----|-----|----------|-----|-----|-----|----------|
| C6  | N1 | C5  | 111.4(3) | N2  | C8  | C7  | 111.4(3) |
| C8  | N2 | Pd1 | 106.9(2) | N2  | C8  | C9  | 105.6(3) |
| C11 | N2 | Pd1 | 113.0(2) | C7  | C8  | C9  | 112.0(3) |
| C11 | N2 | C8  | 104.9(3) | C10 | C9  | C8  | 105.3(3) |
| C12 | N2 | Pd1 | 107.7(2) | C11 | C10 | C9  | 102.3(3) |
| C12 | N2 | C8  | 112.5(3) | N2  | C11 | C10 | 103.0(3) |

**Table 6** Hydrogen Atom Coordinates ( $\text{\AA}\times 10^4$ ) and Isotropic Displacement Parameters ( $\text{\AA}^2\times 10^3$ ) for dh1-43a\_ABS, Complex 2.

| Atom | x        | y       | z       | U(eq) |
|------|----------|---------|---------|-------|
| H5C  | 1796.48  | 4498.08 | 2726.81 | 47    |
| H5D  | 548.24   | 4642.05 | 3219.14 | 47    |
| H6D  | 6902.19  | 5401.88 | 4712.21 | 40    |
| H6E  | 5563.81  | 5167.78 | 4287.2  | 40    |
| H2   | -2256.62 | 6041.83 | 7934.69 | 16    |
| H3A  | -1354.78 | 3368.68 | 7793.48 | 24    |
| H3B  | -3049.91 | 3898.09 | 8003.11 | 24    |
| H4A  | -1946.31 | 3190.08 | 6592.67 | 29    |
| H4B  | -3677.09 | 3033.47 | 6896.99 | 29    |
| H5A  | -3200.21 | 4968.12 | 6027.05 | 27    |
| H5B  | -4184.69 | 5317.53 | 6745.78 | 27    |
| H6A  | -1495.8  | 7906.88 | 6966.38 | 40    |
| H6B  | -3275.01 | 7515.65 | 7045.24 | 40    |
| H6C  | -2497.57 | 7582.38 | 6257.8  | 40    |
| H8   | 2414.64  | 5243.16 | 4589.57 | 19    |
| H9A  | 901.55   | 2835.42 | 4779.28 | 32    |
| H9B  | 2707.47  | 3004.9  | 4607.27 | 32    |
| H10A | 1303.73  | 2707.95 | 6009.06 | 24    |
| H10B | 2924.73  | 2081.5  | 5743.78 | 24    |
| H11A | 3107.07  | 4165.2  | 6537.88 | 20    |
| H11B | 4141.53  | 4190.93 | 5810.39 | 20    |
| H12A | 2300.69  | 7302.91 | 5522.31 | 36    |
| H12B | 3889.64  | 6508.39 | 5413.78 | 36    |
| H12C | 3261.09  | 6807.96 | 6215.19 | 36    |

## Experimental



Single crystals of Complex 2,  $C_{12}H_{24}N_2O_6Pd$  [dh1-43a\_ABS] were [crystallized from water/acetone]. A suitable crystal was selected and [mounted on a fiber loop] on a Oxford Diffraction Gemini Ultra diffractometer. The crystal was kept at 100.15 K during data collection. Using Olex2 [1], the structure was solved with the ShelXS-1997 [2] structure solution program using Direct Methods and refined with the ShelXL-1997 [3] refinement package using Least Squares minimisation.

1. Dolomanov, O.V., Bourhis, L.J., Gildea, R.J, Howard, J.A.K. & Puschmann, H. (2009), J. Appl. Cryst. 42, 339-341.
2. Sheldrick, G.M. (2008). Acta Cryst. A64, 112-122.
3. Sheldrick, G.M. (2008). Acta Cryst. A64, 112-122.

### Crystal structure determination of Complex 2, [dh1-43a\_ABS]

**Crystal Data** for  $C_{12}H_{24}N_2O_6Pd$  ( $M = 398.73$  g/mol): orthorhombic, space group  $P2_12_12_1$  (no. 19),  $a = 8.69102(15)$  Å,  $b = 9.8633(3)$  Å,  $c = 18.4039(3)$  Å,  $V = 1577.61(6)$  Å<sup>3</sup>,  $Z = 4$ ,  $T = 100.15$  K,  $\mu(\text{MoK}\alpha) = 1.204$  mm<sup>-1</sup>,  $D_{\text{calc}} = 1.679$  g/cm<sup>3</sup>, 8854 reflections measured ( $7.66^\circ \leq 2\Theta \leq 55.398^\circ$ ), 3219 unique ( $R_{\text{int}} = 0.0293$ ,  $R_{\text{sigma}} = 0.0361$ ) which were used in all calculations. The final  $R_1$  was 0.0228 ( $I > 2\sigma(I)$ ) and  $wR_2$  was 0.0462 (all data).

### Refinement model description

Number of restraints - 0, number of constraints - unknown.

Details:

#### 1. Fixed Uiso

At 1.2 times of:

All C(H) groups, All C(H,H) groups

At 1.5 times of:

All C(H,H,H) groups, All O(H,H) groups

#### 2.a Free rotating group:

O5(H5C,H5D), O6(H6D,H6E)

#### 2.b Ternary CH refined with riding coordinates:

C2(H2), C8(H8)

#### 2.c Secondary CH2 refined with riding coordinates:

C3(H3A,H3B), C4(H4A,H4B), C5(H5A,H5B), C9(H9A,H9B), C10(H10A,H10B), C11(H11A, H11B)

#### 2.d Idealised Me refined as rotating group:

C6(H6A,H6B,H6C), C12(H12A,H12B,H12C)

## Report III. Experimental Details and Bond Lengths and Angles for Complex 3.

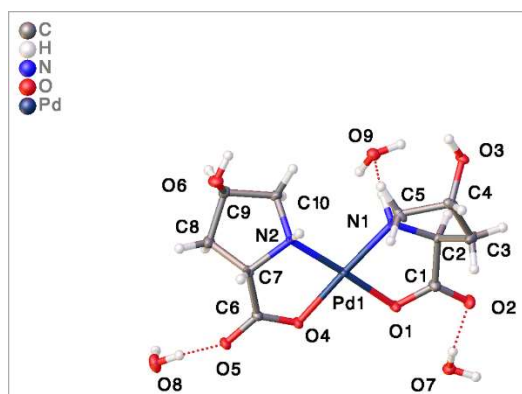

Table 1 Crystal data and structure refinement for dh1-105, Complex 3.

|                                    |                                                                  |
|------------------------------------|------------------------------------------------------------------|
| Identification code                | dh1-105                                                          |
| Empirical formula                  | C <sub>10</sub> H <sub>22</sub> N <sub>2</sub> O <sub>9</sub> Pd |
| Formula weight                     | 420.69                                                           |
| Temperature/K                      | 100.0                                                            |
| Crystal system                     | monoclinic                                                       |
| Space group                        | P2 <sub>1</sub>                                                  |
| a/Å                                | 9.7784(2)                                                        |
| b/Å                                | 7.58624(13)                                                      |
| c/Å                                | 11.0500(2)                                                       |
| α/°                                | 90                                                               |
| β/°                                | 114.330(3)                                                       |
| γ/°                                | 90                                                               |
| Volume/Å <sup>3</sup>              | 746.90(3)                                                        |
| Z                                  | 2                                                                |
| ρ <sub>calc</sub> /cm <sup>3</sup> | 1.871                                                            |
| μ/mm <sup>-1</sup>                 | 1.291                                                            |
| F(000)                             | 428.0                                                            |
| Crystal size/mm <sup>3</sup>       | 0.334 × 0.2068 × 0.1657                                          |
| Radiation                          | MoKα (λ = 0.71073)                                               |
| 2θ range for data collection/°     | 7.054 to 60.124                                                  |
| Index ranges                       | -13 ≤ h ≤ 13, -10 ≤ k ≤ 10, -15 ≤ l ≤ 15                         |
| Reflections collected              | 15035                                                            |
| Independent reflections            | 4385 [R <sub>int</sub> = 0.0427, R <sub>sigma</sub> = 0.0393]    |
| Data/restraints/parameters         | 4385/3/216                                                       |
| Goodness-of-fit on F <sup>2</sup>  | 1.046                                                            |
| Final R indexes [I ≥ 2σ (I)]       | R <sub>1</sub> = 0.0240, wR <sub>2</sub> = 0.0582                |
| Final R indexes [all data]         | R <sub>1</sub> = 0.0250, wR <sub>2</sub> = 0.0590                |

Largest diff. peak/hole / e Å<sup>-3</sup> 0.85/-0.76

Flack parameter -0.031(19)

**Table 2 Fractional Atomic Coordinates (×10<sup>4</sup>) and Equivalent Isotropic Displacement Parameters (Å<sup>2</sup>×10<sup>3</sup>) for dh1-105, Complex 3. U<sub>eq</sub> is defined as 1/3 of the trace of the orthogonalised U<sub>ij</sub> tensor.**

| Atom | x          | y          | z           | U(eq)    |
|------|------------|------------|-------------|----------|
| Pd1  | -4547.8(2) | -2822.9(5) | -3765.8(2)  | 10.06(7) |
| O1   | -5302(2)   | -2903(8)   | -5744.1(19) | 15.5(5)  |
| O2   | -7371(3)   | -3101(5)   | -7606(2)    | 20.4(7)  |
| O3   | -9897(2)   | -2421(3)   | -4427(2)    | 15.3(6)  |
| O4   | -2402(2)   | -2563(5)   | -3484(2)    | 15.0(8)  |
| O5   | -78(2)     | -2333(3)   | -1964(2)    | 15.2(5)  |
| O6   | -2712(3)   | -3160(4)   | 1116(2)     | 19.1(7)  |
| N1   | -6731(3)   | -3001(7)   | -4110(2)    | 11.7(7)  |
| N2   | -3697(2)   | -2748(9)   | -1766(2)    | 10.1(5)  |
| C1   | -6745(3)   | -3021(7)   | -6387(3)    | 15.6(8)  |
| C2   | -7690(3)   | -3116(5)   | -5587(3)    | 11.4(8)  |
| C3   | -8784(4)   | -1559(6)   | -5881(4)    | 22.5(8)  |
| C4   | -8884(4)   | -1192(5)   | -4568(4)    | 16.0(6)  |
| C5   | -7278(4)   | -1502(5)   | -3573(4)    | 19.4(7)  |
| C6   | -1445(3)   | -2449(4)   | -2277(3)    | 12.7(7)  |
| C7   | -2020(3)   | -2444(4)   | -1191(3)    | 12.0(7)  |
| C8   | -1325(4)   | -3905(5)   | -151(3)     | 17.4(7)  |
| C9   | -2603(4)   | -4440(5)   | 224(3)      | 14.9(6)  |
| C10  | -3940(4)   | -4384(5)   | -1120(3)    | 15.3(7)  |
| O7   | -5465(3)   | -4214(4)   | -8786(3)    | 16.8(5)  |
| O8   | 2435(3)    | -4438(4)   | -1319(3)    | 21.9(6)  |
| O9   | -7094(3)   | -6644(4)   | -3602(2)    | 15.6(5)  |

**Table 3 Anisotropic Displacement Parameters (Å<sup>2</sup>×10<sup>3</sup>) for dh1-105, Complex 3. The Anisotropic displacement factor exponent takes the form: -2π<sup>2</sup>[h<sup>2</sup>a<sup>2</sup>U<sub>11</sub>+2hka\*b\*U<sub>12</sub>+...].**

| Atom | U <sub>11</sub> | U <sub>22</sub> | U <sub>33</sub> | U <sub>23</sub> | U <sub>13</sub> | U <sub>12</sub> |
|------|-----------------|-----------------|-----------------|-----------------|-----------------|-----------------|
| Pd1  | 7.31(10)        | 14.45(11)       | 9.28(10)        | 0.16(13)        | 4.28(7)         | 0.22(13)        |
| O1   | 10.7(8)         | 26.6(14)        | 10.4(8)         | -2(2)           | 5.5(7)          | -2.1(19)        |
| O2   | 14.6(10)        | 36(2)           | 10.7(9)         | -2.1(12)        | 5.0(8)          | -1.1(12)        |

|     |          |          |          |           |          |          |
|-----|----------|----------|----------|-----------|----------|----------|
| O3  | 12.5(10) | 21.6(16) | 14.9(10) | -3.7(9)   | 8.6(8)   | -4.2(9)  |
| O4  | 8.2(9)   | 26(2)    | 11.6(9)  | 0.4(11)   | 4.7(7)   | -0.1(11) |
| O5  | 8.4(10)  | 22.9(14) | 14.9(10) | -0.2(9)   | 5.3(8)   | 0.2(8)   |
| O6  | 20.2(11) | 25(2)    | 16.5(10) | -1.8(10)  | 11.7(9)  | -3.0(11) |
| N1  | 7.2(9)   | 17(2)    | 9.9(9)   | -1.4(14)  | 3.0(8)   | 2.0(13)  |
| N2  | 7.9(9)   | 12.7(13) | 10.5(9)  | 2.9(19)   | 4.6(7)   | 0.2(19)  |
| C1  | 12.9(12) | 22(2)    | 13.9(12) | -1.6(16)  | 7.2(10)  | -0.7(16) |
| C2  | 9.3(11)  | 16(2)    | 9.3(11)  | 2.7(12)   | 3.9(9)   | 0.9(12)  |
| C3  | 18.5(17) | 33(2)    | 20.2(17) | 13.9(16)  | 12.1(14) | 10.8(16) |
| C4  | 13.2(15) | 12.8(15) | 25.1(17) | 1.7(13)   | 11.1(14) | 1.9(12)  |
| C5  | 10.0(15) | 21.1(19) | 27.8(18) | -10.7(15) | 8.6(14)  | -2.9(13) |
| C6  | 10.5(13) | 16(2)    | 13.4(13) | -0.7(11)  | 6.6(11)  | -0.6(11) |
| C7  | 8.3(12)  | 17(2)    | 12.5(12) | -1.0(11)  | 5.8(10)  | 1.2(11)  |
| C8  | 11.8(15) | 25.3(18) | 16.1(15) | 4.9(14)   | 6.8(13)  | 4.1(13)  |
| C9  | 15.0(15) | 17.7(16) | 12.8(14) | 2.3(13)   | 6.5(12)  | 1.9(13)  |
| C10 | 13.9(15) | 19.2(17) | 12.6(14) | 3.6(13)   | 5.3(12)  | -1.6(13) |
| O7  | 15.5(12) | 21.9(14) | 14.8(12) | 0.1(10)   | 8.1(10)  | -0.7(10) |
| O8  | 12.9(12) | 23.5(14) | 24.2(13) | -3.1(11)  | 2.5(11)  | 2.9(11)  |
| O9  | 14.7(12) | 16.1(12) | 17.7(11) | -0.1(10)  | 8.5(10)  | 0.4(10)  |

**Table 4 Bond Lengths for dh1-105, Complex 3.**

| Atom | Atom | Length/Å   | Atom | Atom | Length/Å |
|------|------|------------|------|------|----------|
| Pd1  | O1   | 1.9995(19) | N1   | C5   | 1.482(6) |
| Pd1  | O4   | 2.001(2)   | N2   | C7   | 1.513(4) |
| Pd1  | N1   | 2.013(2)   | N2   | C10  | 1.499(6) |
| Pd1  | N2   | 2.016(2)   | C1   | C2   | 1.521(4) |
| O1   | C1   | 1.295(4)   | C2   | C3   | 1.535(5) |
| O2   | C1   | 1.231(4)   | C3   | C4   | 1.519(5) |
| O3   | C4   | 1.415(4)   | C4   | C5   | 1.518(5) |
| O4   | C6   | 1.278(4)   | C6   | C7   | 1.520(4) |
| O5   | C6   | 1.239(4)   | C7   | C8   | 1.539(5) |
| O6   | C9   | 1.419(4)   | C8   | C9   | 1.525(5) |
| N1   | C2   | 1.513(4)   | C9   | C10  | 1.522(4) |

**Table 5 Bond Angles for dh1-105, Complex 3.**

| Atom | Atom | Atom | Angle/°    | Atom | Atom | Atom | Angle/°  |
|------|------|------|------------|------|------|------|----------|
| O1   | Pd1  | O4   | 93.64(8)   | N1   | C2   | C3   | 104.6(3) |
| O1   | Pd1  | N1   | 84.65(9)   | C1   | C2   | C3   | 112.2(3) |
| O1   | Pd1  | N2   | 177.54(8)  | C4   | C3   | C2   | 104.6(3) |
| O4   | Pd1  | N1   | 177.49(18) | O3   | C4   | C3   | 108.0(3) |
| O4   | Pd1  | N2   | 83.92(9)   | O3   | C4   | C5   | 112.3(3) |
| N1   | Pd1  | N2   | 97.79(9)   | C5   | C4   | C3   | 102.1(3) |
| C1   | O1   | Pd1  | 115.41(18) | N1   | C5   | C4   | 105.4(3) |
| C6   | O4   | Pd1  | 115.99(19) | O4   | C6   | C7   | 118.3(3) |
| C2   | N1   | Pd1  | 110.21(17) | O5   | C6   | O4   | 122.5(3) |
| C5   | N1   | Pd1  | 113.8(3)   | O5   | C6   | C7   | 119.1(3) |
| C5   | N1   | C2   | 108.1(3)   | N2   | C7   | C6   | 110.9(2) |
| C7   | N2   | Pd1  | 110.57(17) | N2   | C7   | C8   | 105.8(3) |
| C10  | N2   | Pd1  | 115.1(3)   | C6   | C7   | C8   | 113.3(3) |
| C10  | N2   | C7   | 106.4(3)   | C9   | C8   | C7   | 103.6(3) |
| O1   | C1   | C2   | 118.0(2)   | O6   | C9   | C8   | 108.1(3) |
| O2   | C1   | O1   | 122.8(3)   | O6   | C9   | C10  | 112.2(3) |
| O2   | C1   | C2   | 119.2(3)   | C10  | C9   | C8   | 101.5(3) |
| N1   | C2   | C1   | 111.7(2)   | N2   | C10  | C9   | 104.3(3) |

**Table 6 Hydrogen Bonds for dh1-105, Complex 3.**

| D  | H   | A               | d(D-H)/Å | d(H-A)/Å | d(D-A)/Å | D-H-A/° |
|----|-----|-----------------|----------|----------|----------|---------|
| O3 | H3  | O5 <sup>1</sup> | 0.84     | 1.97     | 2.800(3) | 172.3   |
| O6 | H6  | O7 <sup>2</sup> | 0.84     | 2.03     | 2.853(3) | 166.9   |
| N1 | H1  | O9              | 1.00     | 1.94     | 2.871(6) | 153.3   |
| O7 | H7A | O2              | 0.85(3)  | 1.98(4)  | 2.808(4) | 166(6)  |
| O7 | H7B | O8 <sup>3</sup> | 0.82(4)  | 1.92(4)  | 2.710(4) | 161(7)  |
| O8 | H8C | O5              | 0.87     | 1.91     | 2.766(4) | 166.5   |
| O8 | H8D | O6 <sup>4</sup> | 0.87     | 2.02     | 2.836(4) | 156.3   |
| O9 | H9A | O1 <sup>5</sup> | 0.87     | 2.02     | 2.884(4) | 173.3   |

<sup>1</sup>-1+X,+Y,+Z; <sup>2</sup>+X,+Y,1+Z; <sup>3</sup>-1+X,+Y,-1+Z; <sup>4</sup>-X,-1/2+Y,-Z; <sup>5</sup>-1-X,-1/2+Y,-1-Z

**Table 7 Hydrogen Atom Coordinates ( $\text{\AA}\times 10^4$ ) and Isotropic Displacement Parameters ( $\text{\AA}^2\times 10^3$ ) for dh1-105, Complex 3.**

| Atom | <i>x</i>  | <i>y</i>   | <i>z</i>  | U(eq)  |
|------|-----------|------------|-----------|--------|
| H3   | -9902.72  | -2307.92   | -3672.68  | 23     |
| H6   | -3497.37  | -3334.36   | 1232.18   | 29     |
| H1   | -6876.31  | -4108.44   | -3685.69  | 14     |
| H2   | -4169.47  | -1736.9    | -1500.01  | 12     |
| H2A  | -8267.31  | -4246.18   | -5789.69  | 14     |
| H3A  | -8395.33  | -516.88    | -6179.13  | 27     |
| H3B  | -9779.87  | -1873.41   | -6577.15  | 27     |
| H4   | -9207.79  | 47.43      | -4525.17  | 19     |
| H5A  | -6657.54  | -439.76    | -3490.1   | 23     |
| H5B  | -7245.84  | -1794.38   | -2688.55  | 23     |
| H7   | -1792.6   | -1274.19   | -733.5    | 14     |
| H8A  | -993.6    | -4912.66   | -532.9    | 21     |
| H8B  | -456.62   | -3453.77   | 631.32    | 21     |
| H9   | -2445.6   | -5649.15   | 618.73    | 18     |
| H10A | -3961.14  | -5441.96   | -1652.07  | 18     |
| H10B | -4893.73  | -4316.1    | -1010.66  | 18     |
| H7A  | -5930(60) | -3730(80)  | -8370(50) | 43(17) |
| H7B  | -6070(60) | -4040(100) | -9550(40) | 60(20) |
| H8C  | 1563.12   | -3924.72   | -1590.37  | 33     |
| H8D  | 2310.4    | -5561.53   | -1485.36  | 33     |
| H9A  | -6347.51  | -7077.63   | -3741.41  | 23     |
| H9B  | -7979.9   | -6918.84   | -4197.86  | 23     |

## Experimental

Single crystals of Complex 3,  $\text{C}_{10}\text{H}_{22}\text{N}_2\text{O}_9\text{Pd}$  [dh1-105] were [crystallized from water/acetone]. A suitable crystal was selected and [mounted on a fiber loop] on a Oxford Diffraction Gemini Ultra diffractometer. The crystal was kept at 100.0 K during data collection. Using Olex2 [1], the structure was solved with the ShelXS-1997 [2] structure solution program using Direct Methods and refined with the ShelXL [3] refinement package using Least Squares minimisation.

1. Dolomanov, O.V., Bourhis, L.J., Gildea, R.J., Howard, J.A.K. & Puschmann, H. (2009), *J. Appl. Cryst.* 42, 339-341.
2. Sheldrick, G.M. (2008). *Acta Cryst.* A64, 112-122.
3. Sheldrick, G.M. (2015). *Acta Cryst.* C71, 3-8.

## Crystal structure determination of [dh1-105]

Crystal Data for Complex 3,  $\text{C}_{10}\text{H}_{22}\text{N}_2\text{O}_9\text{Pd}$  ( $M = 420.69$  g/mol): monoclinic, space group  $P2_1$  (no. 4),  $a = 9.7784(2)$   $\text{\AA}$ ,  $b = 7.58624(13)$   $\text{\AA}$ ,  $c = 11.0500(2)$   $\text{\AA}$ ,  $\beta = 114.330(3)^\circ$ ,  $V = 746.90(3)$   $\text{\AA}^3$ ,  $Z = 2$ ,  $T =$

100.0 K,  $\mu(\text{MoK}\alpha) = 1.291 \text{ mm}^{-1}$ ,  $D_{\text{calc}} = 1.871 \text{ g/cm}^3$ , 15035 reflections measured ( $7.054^\circ \leq 2\Theta \leq 60.124^\circ$ ), 4385 unique ( $R_{\text{int}} = 0.0427$ ,  $R_{\text{sigma}} = 0.0393$ ) which were used in all calculations. The final  $R_1$  was 0.0240 ( $I > 2\sigma(I)$ ) and  $wR_2$  was 0.0590 (all data).

### Refinement model description

Number of restraints - 3, number of constraints - unknown.

Details:

1. Fixed Uiso

At 1.2 times of:

All C(H) groups, All C(H,H) groups, All N(H) groups

At 1.5 times of:

All O(H) groups, All O(H,H) groups

2. Restrained distances

O7-H7A = O7-H7B

0.9 with sigma of 0.03

3.a Free rotating group:

O8(H8C,H8D), O9(H9A,H9B)

3.b Ternary CH refined with riding coordinates:

N1(H1), N2(H2), C2(H2A), C4(H4), C7(H7), C9(H9)

3.c Secondary CH2 refined with riding coordinates:

C3(H3A,H3B), C5(H5A,H5B), C8(H8A,H8B), C10(H10A,H10B)

3.d Idealised tetrahedral OH refined as rotating group:

O3(H3), O6(H6)

### Report IV. Experimental Details and Bond Lengths and Angles for Complex 4.

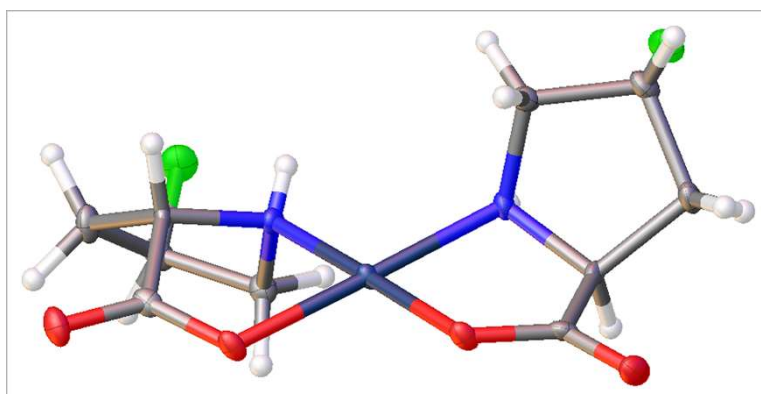

**Table 1** Crystal data and structure refinement for dh1-127, Complex 4.

|                     |                                                                     |
|---------------------|---------------------------------------------------------------------|
| Identification code | dh1-127                                                             |
| Empirical formula   | $\text{C}_{10}\text{H}_{14}\text{N}_2\text{O}_4\text{F}_2\text{Pd}$ |
| Formula weight      | 370.63                                                              |
| Temperature/K       | 100.15                                                              |
| Crystal system      | monoclinic                                                          |
| Space group         | C2                                                                  |

|                                             |                                                                |
|---------------------------------------------|----------------------------------------------------------------|
| a/Å                                         | 10.0581(4)                                                     |
| b/Å                                         | 9.7330(3)                                                      |
| c/Å                                         | 6.3547(3)                                                      |
| $\alpha$ /°                                 | 90                                                             |
| $\beta$ /°                                  | 96.618(4)                                                      |
| $\gamma$ /°                                 | 90                                                             |
| Volume/Å <sup>3</sup>                       | 617.95(4)                                                      |
| Z                                           | 2                                                              |
| $\rho_{\text{calc}}$ /g/cm <sup>3</sup>     | 1.992                                                          |
| $\mu$ /mm <sup>-1</sup>                     | 1.539                                                          |
| F(000)                                      | 368.0                                                          |
| Crystal size/mm <sup>3</sup>                | 0.2919 × 0.1896 × 0.1105                                       |
| Radiation                                   | MoK $\alpha$ ( $\lambda$ = 0.71073)                            |
| 2 $\Theta$ range for data collection/°      | 8.158 to 64.822                                                |
| Index ranges                                | -14 ≤ h ≤ 15, -14 ≤ k ≤ 14, -9 ≤ l ≤ 9                         |
| Reflections collected                       | 6274                                                           |
| Independent reflections                     | 2072 [ $R_{\text{int}}$ = 0.0381, $R_{\text{sigma}}$ = 0.0441] |
| Data/restraints/parameters                  | 2072/1/91                                                      |
| Goodness-of-fit on F <sup>2</sup>           | 1.117                                                          |
| Final R indexes [ $I \geq 2\sigma(I)$ ]     | $R_1$ = 0.0318, $wR_2$ = 0.0698                                |
| Final R indexes [all data]                  | $R_1$ = 0.0329, $wR_2$ = 0.0701                                |
| Largest diff. peak/hole / e Å <sup>-3</sup> | 0.47/-0.69                                                     |
| Flack parameter                             | 0.00(5)                                                        |

**Table 2** Fractional Atomic Coordinates ( $\times 10^4$ ) and Equivalent Isotropic Displacement Parameters ( $\text{\AA}^2 \times 10^3$ ) for dh1-127, Complex 4.  $U_{\text{eq}}$  is defined as 1/3 of the trace of the orthogonalised  $U_{ij}$  tensor.

| Atom | x        | y         | z        | $U(\text{eq})$ |
|------|----------|-----------|----------|----------------|
| Pd1  | 5000     | 4078.4(9) | 5000     | 10.09(11)      |
| F1   | 7873(3)  | 7736(3)   | 8454(5)  | 21.0(6)        |
| O1   | 6423(8)  | 2709(7)   | 6081(11) | 13.3(13)       |
| O2   | 8626(4)  | 2544(4)   | 6864(7)  | 18.1(8)        |
| N1   | 6412(8)  | 5423(9)   | 6148(13) | 11.7(15)       |
| C1   | 7607(10) | 3222(8)   | 6381(13) | 12.6(15)       |
| C2   | 7743(9)  | 4765(9)   | 6083(14) | 11.9(15)       |
| C3   | 8691(5)  | 5476(6)   | 7819(10) | 16.8(10)       |
| C4   | 7799(5)  | 6345(5)   | 9072(8)  | 16.0(9)        |
| C5   | 6396(5)  | 5834(5)   | 8404(7)  | 14.1(8)        |



**Table 3 Anisotropic Displacement Parameters ( $\text{\AA}^2 \times 10^3$ ) for dh1-127, Complex 4. The Anisotropic displacement factor exponent takes the form:  $-2\pi^2[h^2a^*U_{11}+2hka^*b^*U_{12}+\dots]$ .**

| Atom | U <sub>11</sub> | U <sub>22</sub> | U <sub>33</sub> | U <sub>23</sub> | U <sub>13</sub> | U <sub>12</sub> |
|------|-----------------|-----------------|-----------------|-----------------|-----------------|-----------------|
| Pd1  | 10.88(18)       | 7.49(16)        | 11.11(18)       | 0               | -2.20(12)       | 0               |
| F1   | 24.5(16)        | 12.5(13)        | 25.7(16)        | -3.5(11)        | 1.4(13)         | -2.4(11)        |
| O1   | 16(3)           | 7(3)            | 15(3)           | 0(3)            | -4(2)           | 1(3)            |
| O2   | 16.1(19)        | 16.2(18)        | 21(2)           | -3.9(17)        | -3.7(17)        | 6.0(13)         |
| N1   | 9(4)            | 12(4)           | 13(3)           | 0(3)            | -1(3)           | -2(3)           |
| C1   | 18(3)           | 9(3)            | 10(3)           | -3(2)           | 1(2)            | 2(2)            |
| C2   | 7(3)            | 17(3)           | 11(3)           | -2(2)           | -2(2)           | 3(2)            |
| C3   | 11(2)           | 16(2)           | 22(3)           | -4(2)           | -4(2)           | 0.3(17)         |
| C4   | 18(2)           | 15(2)           | 13(2)           | -1.6(16)        | -4.1(17)        | -0.7(16)        |
| C5   | 15(2)           | 14(2)           | 14(2)           | -2.8(15)        | -0.2(16)        | 1.0(15)         |

**Table 4 Bond Lengths for dh1-127, Complex 4.**

| Atom | Atom            | Length/ $\text{\AA}$ | Atom | Atom | Length/ $\text{\AA}$ |
|------|-----------------|----------------------|------|------|----------------------|
| Pd1  | O1              | 2.017(7)             | N1   | C2   | 1.489(12)            |
| Pd1  | O1 <sup>1</sup> | 2.017(7)             | N1   | C5   | 1.490(9)             |
| Pd1  | N1              | 2.006(9)             | C1   | C2   | 1.522(7)             |
| Pd1  | N1 <sup>1</sup> | 2.006(9)             | C2   | C3   | 1.537(11)            |
| F1   | C4              | 1.415(5)             | C3   | C4   | 1.522(7)             |
| O1   | C1              | 1.285(12)            | C4   | C5   | 1.510(7)             |
| O2   | C1              | 1.228(11)            |      |      |                      |

<sup>1</sup>1-X,+Y,1-Z

**Table 5 Bond Angles for dh1-127, Complex 4.**

| Atom            | Atom | Atom            | Angle/ $^\circ$ | Atom | Atom | Atom | Angle/ $^\circ$ |
|-----------------|------|-----------------|-----------------|------|------|------|-----------------|
| O1              | Pd1  | O1 <sup>1</sup> | 97.3(4)         | O2   | C1   | O1   | 124.1(8)        |
| N1              | Pd1  | O1              | 82.11(13)       | O2   | C1   | C2   | 118.5(10)       |
| N1 <sup>1</sup> | Pd1  | O1              | 178.6(4)        | N1   | C2   | C1   | 109.1(10)       |
| N1 <sup>1</sup> | Pd1  | O1 <sup>1</sup> | 82.11(13)       | N1   | C2   | C3   | 105.7(6)        |
| N1              | Pd1  | O1 <sup>1</sup> | 178.6(4)        | C1   | C2   | C3   | 114.4(9)        |
| N1              | Pd1  | N1 <sup>1</sup> | 98.5(5)         | C4   | C3   | C2   | 105.7(5)        |

|    |    |     |           |    |    |    |          |
|----|----|-----|-----------|----|----|----|----------|
| C1 | O1 | Pd1 | 113.7(6)  | F1 | C4 | C3 | 109.5(4) |
| C2 | N1 | Pd1 | 108.1(6)  | F1 | C4 | C5 | 108.3(4) |
| C2 | N1 | C5  | 104.6(6)  | C5 | C4 | C3 | 105.0(4) |
| C5 | N1 | Pd1 | 116.1(5)  | N1 | C5 | C4 | 104.2(5) |
| O1 | C1 | C2  | 117.4(10) |    |    |    |          |

<sup>1</sup>1-X,+Y,1-Z

**Table 6 Hydrogen Atom Coordinates ( $\text{\AA}\times 10^4$ ) and Isotropic Displacement Parameters ( $\text{\AA}^2\times 10^3$ ) for dh1-127, Complex 4.**

| Atom | x        | y        | z         | U(eq)  |
|------|----------|----------|-----------|--------|
| H2   | 8059     | 4947     | 4673      | 14     |
| H3A  | 9188     | 4787     | 8748      | 20     |
| H3B  | 9343     | 6062     | 7183      | 20     |
| H4   | 8049     | 6234     | 10632     | 19     |
| H5A  | 6181     | 5040     | 9278      | 17     |
| H5B  | 5731     | 6570     | 8535      | 17     |
| H1   | 6420(60) | 6020(70) | 5470(100) | 13(15) |

## Experimental

Single crystals of Complex 4,  $\text{C}_{10}\text{H}_{14}\text{N}_2\text{O}_4\text{F}_2\text{Pd}$  [dh1-127] were [crystallized from water/acetone]. A suitable crystal was selected and [mounted on fiber loop] on a Oxford Diffraction Gemini Ultra diffractometer. The crystal was kept at 100.15 K during data collection. Using Olex2 [1], the structure was solved with the ShelXS-1997 [2] structure solution program using Direct Methods and refined with the ShelXL [3] refinement package using Least Squares minimisation.

1. Dolomanov, O.V., Bourhis, L.J., Gildea, R.J., Howard, J.A.K. & Puschmann, H. (2009), J. Appl. Cryst. 42, 339-341.
2. Sheldrick, G.M. (2008). Acta Cryst. A64, 112-122.
3. Sheldrick, G.M. (2015). Acta Cryst. C71, 3-8.

## Crystal structure determination of [dh1-127]

Crystal Data for Complex 4,  $\text{C}_{10}\text{H}_{14}\text{N}_2\text{O}_4\text{F}_2\text{Pd}$  ( $M = 370.63$  g/mol): monoclinic, space group C2 (no. 5),  $a = 10.0581(4)$   $\text{\AA}$ ,  $b = 9.7330(3)$   $\text{\AA}$ ,  $c = 6.3547(3)$   $\text{\AA}$ ,  $\beta = 96.618(4)^\circ$ ,  $V = 617.95(4)$   $\text{\AA}^3$ ,  $Z = 2$ ,  $T = 100.15$  K,  $\mu(\text{MoK}\alpha) = 1.539$   $\text{mm}^{-1}$ ,  $D_{\text{calc}} = 1.992$   $\text{g/cm}^3$ , 6274 reflections measured ( $8.158^\circ \leq 2\theta \leq 64.822^\circ$ ), 2072 unique ( $R_{\text{int}} = 0.0381$ ,  $R_{\text{sigma}} = 0.0441$ ) which were used in all calculations. The final  $R_1$  was 0.0318 ( $I > 2\sigma(I)$ ) and  $wR_2$  was 0.0701 (all data).

## Refinement model description

Number of restraints - 1, number of constraints - unknown.

Details:

## 1. Fixed Uiso

At 1.2 times of:

All C(H) groups, All C(H,H) groups

## 2.a Ternary CH refined with riding coordinates:

C2(H2), C4(H4)

## 2.b Secondary CH2 refined with riding coordinates:

C3(H3A,H3B), C5(H5A,H5B)

**Report V. Experimental Details and Bond Lengths and Angles for Complex 5.**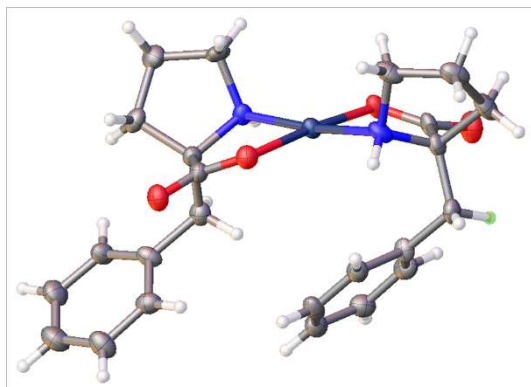**Table 1** Crystal data and structure refinement for dh1-171b, Complex 5.

|                                    |                                                                  |
|------------------------------------|------------------------------------------------------------------|
| Identification code                | dh1-171b                                                         |
| Empirical formula                  | C <sub>24</sub> H <sub>28</sub> N <sub>2</sub> O <sub>4</sub> Pd |
| Formula weight                     | 514.88                                                           |
| Temperature/K                      | 100.15                                                           |
| Crystal system                     | orthorhombic                                                     |
| Space group                        | P2 <sub>1</sub> 2 <sub>1</sub> 2 <sub>1</sub>                    |
| a/Å                                | 5.72249(19)                                                      |
| b/Å                                | 18.6628(7)                                                       |
| c/Å                                | 20.0836(7)                                                       |
| α/°                                | 90                                                               |
| β/°                                | 90                                                               |
| γ/°                                | 90                                                               |
| Volume/Å <sup>3</sup>              | 2144.89(13)                                                      |
| Z                                  | 4                                                                |
| ρ <sub>calc</sub> /cm <sup>3</sup> | 1.594                                                            |
| μ/mm <sup>-1</sup>                 | 7.262                                                            |
| F(000)                             | 1056.0                                                           |
| Crystal size/mm <sup>3</sup>       | 0.0706 × 0.035 × 0.0138                                          |
| Radiation                          | CuKα (λ = 1.54184)                                               |
| 2θ range for data collection/°     | 6.466 to 149.698                                                 |
| Index ranges                       | -6 ≤ h ≤ 7, -22 ≤ k ≤ 16, -25 ≤ l ≤ 23                           |

|                                                |                                                                  |
|------------------------------------------------|------------------------------------------------------------------|
| Reflections collected                          | 10868                                                            |
| Independent reflections                        | 4221 [ $R_{\text{int}} = 0.0862$ , $R_{\text{sigma}} = 0.0704$ ] |
| Data/restraints/parameters                     | 4221/0/280                                                       |
| Goodness-of-fit on $F^2$                       | 1.062                                                            |
| Final R indexes [ $I \geq 2\sigma(I)$ ]        | $R_1 = 0.0477$ , $wR_2 = 0.1217$                                 |
| Final R indexes [all data]                     | $R_1 = 0.0578$ , $wR_2 = 0.1310$                                 |
| Largest diff. peak/hole / $e \text{ \AA}^{-3}$ | 0.56/-0.92                                                       |
| Flack parameter                                | -0.008(15)                                                       |

**Table 2 Fractional Atomic Coordinates ( $\times 10^4$ ) and Equivalent Isotropic Displacement Parameters ( $\text{\AA}^2 \times 10^3$ ) for dh1-171b Complex 5.  $U_{\text{eq}}$  is defined as 1/3 of of the trace of the orthogonalised  $U_{ij}$  tensor.**

| Atom | <i>x</i>   | <i>y</i>  | <i>z</i>  | $U(\text{eq})$ |
|------|------------|-----------|-----------|----------------|
| Pd1  | 4348.5(10) | 5722.8(3) | 8055.4(3) | 21.04(18)      |
| O1   | 6925(12)   | 5492(3)   | 7413(3)   | 25.6(13)       |
| O2   | 7615(12)   | 5389(4)   | 6338(4)   | 28.8(14)       |
| O3   | 1742(12)   | 6041(4)   | 8653(3)   | 26.0(13)       |
| O4   | 1063(12)   | 6850(4)   | 9434(4)   | 37.3(16)       |
| N1   | 2330(13)   | 5327(4)   | 7314(4)   | 21.3(14)       |
| N2   | 6362(14)   | 6008(5)   | 8849(4)   | 27.1(16)       |
| C22  | 4939(16)   | 7884(5)   | 7004(5)   | 31(2)          |
| C21  | 3230(20)   | 8054(5)   | 7468(5)   | 32(2)          |
| C20  | 3518(17)   | 7854(5)   | 8132(6)   | 32(2)          |
| C19  | 5491(16)   | 7511(5)   | 8349(4)   | 22.8(15)       |
| C18  | 5854(18)   | 7323(5)   | 9070(4)   | 27.2(18)       |
| C5   | 6280(16)   | 5438(5)   | 6801(4)   | 23.3(19)       |
| C4   | 3591(16)   | 5417(5)   | 6657(5)   | 21.9(17)       |
| C1   | 1994(19)   | 4538(5)   | 7400(5)   | 29.4(19)       |
| C2   | 1481(17)   | 4256(6)   | 6707(5)   | 31.7(18)       |
| C3   | 2931(17)   | 4746(5)   | 6253(5)   | 27.2(18)       |
| C6   | 2846(17)   | 6148(5)   | 6358(5)   | 27.8(18)       |
| C8   | 2252(19)   | 6086(5)   | 5116(5)   | 30(2)          |
| C7   | 3649(15)   | 6279(5)   | 5653(5)   | 25.7(18)       |
| C12  | 5720(20)   | 6641(4)   | 5514(5)   | 30.6(18)       |
| C11  | 6407(19)   | 6789(6)   | 4864(5)   | 37(2)          |
| C17  | 2425(16)   | 6486(5)   | 9116(4)   | 24.6(17)       |
| C16  | 5075(15)   | 6559(5)   | 9254(4)   | 25.4(19)       |
| C15  | 5590(20)   | 6374(6)   | 9993(4)   | 35(2)          |

|     |          |         |         |          |
|-----|----------|---------|---------|----------|
| C14 | 7242(16) | 5720(7) | 9978(5) | 35(2)    |
| C13 | 6732(19) | 5368(6) | 9303(5) | 33(2)    |
| C24 | 7227(18) | 7349(5) | 7875(5) | 28.1(19) |
| C23 | 6958(19) | 7536(6) | 7211(5) | 32(2)    |
| C10 | 5000(20) | 6561(6) | 4338(6) | 41(3)    |
| C9  | 2930(20) | 6206(6) | 4466(5) | 38(2)    |

**Table 3** Anisotropic Displacement Parameters ( $\text{\AA}^2 \times 10^3$ ) for dh1-171b, Complex 5. The Anisotropic displacement factor exponent takes the form:  $-2\pi^2[h^2a^*U_{11}+2hka^*b^*U_{12}+\dots]$ .

| Atom | $U_{11}$ | $U_{22}$ | $U_{33}$ | $U_{23}$ | $U_{13}$ | $U_{12}$ |
|------|----------|----------|----------|----------|----------|----------|
| Pd1  | 15.5(3)  | 27.8(3)  | 19.8(3)  | 0.2(3)   | -0.9(2)  | -1.6(2)  |
| O1   | 18(3)    | 31(3)    | 27(3)    | -2(2)    | -2(3)    | 2(3)     |
| O2   | 20(3)    | 39(3)    | 28(3)    | -5(3)    | 2(3)     | 3(3)     |
| O3   | 17(3)    | 42(3)    | 19(3)    | -1(3)    | 0(2)     | -6(3)    |
| O4   | 20(4)    | 54(4)    | 37(4)    | -13(3)   | 6(3)     | 2(3)     |
| N1   | 13(3)    | 27(4)    | 23(4)    | -3(3)    | 0(3)     | -2(3)    |
| N2   | 21(4)    | 38(4)    | 22(4)    | 10(3)    | -1(3)    | -1(3)    |
| C22  | 31(5)    | 36(4)    | 26(4)    | -1(4)    | -5(4)    | -5(3)    |
| C21  | 28(5)    | 34(4)    | 33(5)    | 5(4)     | -5(4)    | -2(4)    |
| C20  | 28(4)    | 29(4)    | 38(5)    | -2(4)    | 5(4)     | 4(3)     |
| C19  | 11(4)    | 33(4)    | 24(4)    | -3(3)    | 1(3)     | 4(4)     |
| C18  | 25(4)    | 36(4)    | 20(4)    | -7(3)    | -3(4)    | 0(4)     |
| C5   | 26(5)    | 23(3)    | 21(5)    | -3(3)    | 1(3)     | -1(3)    |
| C4   | 19(4)    | 25(4)    | 22(4)    | -2(3)    | 0(3)     | -3(3)    |
| C1   | 35(5)    | 20(3)    | 33(5)    | 3(3)     | -3(4)    | -10(4)   |
| C2   | 34(5)    | 26(4)    | 35(4)    | -2(4)    | 2(4)     | 5(4)     |
| C3   | 22(4)    | 25(4)    | 35(5)    | -8(3)    | -1(4)    | 3(3)     |
| C6   | 24(4)    | 32(5)    | 28(5)    | -4(4)    | 1(4)     | 1(4)     |
| C8   | 30(5)    | 34(4)    | 26(4)    | 2(4)     | -4(4)    | -9(4)    |
| C7   | 16(4)    | 33(4)    | 28(5)    | 10(4)    | 1(3)     | 1(3)     |
| C12  | 26(4)    | 28(4)    | 37(5)    | 3(3)     | 4(4)     | -1(4)    |
| C11  | 26(5)    | 53(6)    | 31(5)    | 6(4)     | 2(4)     | 0(4)     |
| C17  | 20(4)    | 37(4)    | 17(4)    | -3(3)    | 4(3)     | 1(3)     |
| C16  | 26(5)    | 34(4)    | 16(4)    | -2(3)    | -2(3)    | -1(3)    |
| C15  | 28(5)    | 59(6)    | 19(4)    | 5(4)     | -3(4)    | -6(5)    |
| C14  | 22(4)    | 49(5)    | 32(4)    | 13(5)    | -5(3)    | -9(5)    |

|     |       |       |       |       |       |        |
|-----|-------|-------|-------|-------|-------|--------|
| C13 | 28(5) | 44(5) | 29(5) | 15(4) | -3(4) | 3(4)   |
| C24 | 27(5) | 30(4) | 27(5) | -2(3) | 2(3)  | -1(4)  |
| C23 | 29(5) | 43(5) | 24(4) | -2(4) | 6(4)  | -13(4) |
| C10 | 42(7) | 49(6) | 33(5) | 12(5) | 4(4)  | 1(4)   |
| C9  | 46(6) | 44(5) | 26(5) | 5(4)  | -6(5) | 0(5)   |

**Table 4 Bond Lengths for dh1-171b, Complex 5.**

| Atom | Atom | Length/Å  | Atom | Atom | Length/Å  |
|------|------|-----------|------|------|-----------|
| Pd1  | O1   | 2.006(7)  | C18  | C16  | 1.539(13) |
| Pd1  | O3   | 2.004(7)  | C5   | C4   | 1.567(13) |
| Pd1  | N1   | 2.024(7)  | C4   | C3   | 1.540(12) |
| Pd1  | N2   | 2.037(8)  | C4   | C6   | 1.550(13) |
| O1   | C5   | 1.287(12) | C1   | C2   | 1.517(13) |
| O2   | C5   | 1.207(12) | C2   | C3   | 1.534(14) |
| O3   | C17  | 1.306(12) | C6   | C7   | 1.508(13) |
| O4   | C17  | 1.215(12) | C8   | C7   | 1.390(14) |
| N1   | C4   | 1.513(11) | C8   | C9   | 1.380(15) |
| N1   | C1   | 1.494(11) | C7   | C12  | 1.393(14) |
| N2   | C16  | 1.503(12) | C12  | C11  | 1.391(14) |
| N2   | C13  | 1.518(12) | C11  | C10  | 1.394(17) |
| C22  | C21  | 1.385(15) | C17  | C16  | 1.548(13) |
| C22  | C23  | 1.389(15) | C16  | C15  | 1.552(12) |
| C21  | C20  | 1.395(15) | C15  | C14  | 1.544(17) |
| C20  | C19  | 1.369(13) | C14  | C13  | 1.535(15) |
| C19  | C18  | 1.504(12) | C24  | C23  | 1.387(14) |
| C19  | C24  | 1.409(13) | C10  | C9   | 1.380(17) |

**Table 5 Bond Angles for dh1-171b, Complex 5.**

| Atom | Atom | Atom | Angle/°  | Atom | Atom | Atom | Angle/°  |
|------|------|------|----------|------|------|------|----------|
| O1   | Pd1  | N1   | 82.4(3)  | C3   | C4   | C6   | 116.4(8) |
| O1   | Pd1  | N2   | 98.3(3)  | C6   | C4   | C5   | 108.7(7) |
| O3   | Pd1  | O1   | 174.7(3) | N1   | C1   | C2   | 105.1(8) |
| O3   | Pd1  | N1   | 97.1(3)  | C1   | C2   | C3   | 103.5(8) |
| O3   | Pd1  | N2   | 82.8(3)  | C2   | C3   | C4   | 107.7(8) |

|     |     |     |           |     |     |     |           |
|-----|-----|-----|-----------|-----|-----|-----|-----------|
| N1  | Pd1 | N2  | 173.5(3)  | C7  | C6  | C4  | 115.0(8)  |
| C5  | O1  | Pd1 | 114.8(6)  | C9  | C8  | C7  | 122.0(10) |
| C17 | O3  | Pd1 | 113.1(6)  | C8  | C7  | C6  | 120.7(8)  |
| C4  | N1  | Pd1 | 109.2(5)  | C8  | C7  | C12 | 117.4(9)  |
| C1  | N1  | Pd1 | 110.4(6)  | C12 | C7  | C6  | 121.8(9)  |
| C1  | N1  | C4  | 105.7(7)  | C11 | C12 | C7  | 121.7(10) |
| C16 | N2  | Pd1 | 108.9(5)  | C12 | C11 | C10 | 119.2(10) |
| C16 | N2  | C13 | 106.3(7)  | O3  | C17 | C16 | 118.5(8)  |
| C13 | N2  | Pd1 | 110.1(6)  | O4  | C17 | O3  | 122.5(9)  |
| C21 | C22 | C23 | 119.4(10) | O4  | C17 | C16 | 119.0(8)  |
| C22 | C21 | C20 | 120.0(10) | N2  | C16 | C18 | 111.2(7)  |
| C19 | C20 | C21 | 121.7(10) | N2  | C16 | C17 | 108.8(7)  |
| C20 | C19 | C18 | 122.0(9)  | N2  | C16 | C15 | 105.8(8)  |
| C20 | C19 | C24 | 117.8(9)  | C18 | C16 | C17 | 108.8(8)  |
| C24 | C19 | C18 | 120.2(8)  | C18 | C16 | C15 | 112.4(7)  |
| C19 | C18 | C16 | 114.1(7)  | C17 | C16 | C15 | 109.8(8)  |
| O1  | C5  | C4  | 117.4(8)  | C14 | C15 | C16 | 105.9(8)  |
| O2  | C5  | O1  | 124.0(9)  | C13 | C14 | C15 | 103.8(8)  |
| O2  | C5  | C4  | 118.5(8)  | N2  | C13 | C14 | 102.8(9)  |
| N1  | C4  | C5  | 108.0(7)  | C23 | C24 | C19 | 121.2(10) |
| N1  | C4  | C3  | 104.6(7)  | C24 | C23 | C22 | 119.8(10) |
| N1  | C4  | C6  | 107.7(7)  | C9  | C10 | C11 | 120.0(10) |
| C3  | C4  | C5  | 111.0(7)  | C8  | C9  | C10 | 119.7(11) |

**Table 6** Hydrogen Atom Coordinates ( $\text{\AA} \times 10^4$ ) and Isotropic Displacement Parameters ( $\text{\AA}^2 \times 10^3$ ) for dh1-171b, Complex 5.

| Atom | <i>x</i> | <i>y</i> | <i>z</i> | U(eq) |
|------|----------|----------|----------|-------|
| H1   | 786      | 5578     | 7303     | 26    |
| H2   | 7897     | 6202     | 8695     | 33    |
| H22  | 4728     | 8005     | 6548     | 37    |
| H21  | 1873     | 8307     | 7333     | 38    |
| H20  | 2310     | 7958     | 8442     | 38    |
| H18A | 4978     | 7668     | 9348     | 33    |
| H18B | 7534     | 7375     | 9177     | 33    |
| H1A  | 672      | 4439     | 7704     | 35    |
| H1B  | 3423     | 4314     | 7583     | 35    |

|      |      |      |       |    |
|------|------|------|-------|----|
| H2A  | -205 | 4293 | 6602  | 38 |
| H2B  | 1976 | 3750 | 6662  | 38 |
| H3A  | 2009 | 4883 | 5855  | 33 |
| H3B  | 4359 | 4494 | 6102  | 33 |
| H6A  | 1120 | 6179 | 6370  | 33 |
| H6B  | 3469 | 6535 | 6644  | 33 |
| H8   | 785  | 5865 | 5199  | 36 |
| H12  | 6691 | 6790 | 5872  | 37 |
| H11  | 7817 | 7041 | 4779  | 44 |
| H15A | 6349 | 6784 | 10219 | 42 |
| H15B | 4126 | 6256 | 10231 | 42 |
| H14A | 8897 | 5872 | 10008 | 42 |
| H14B | 6894 | 5388 | 10349 | 42 |
| H13A | 8067 | 5073 | 9152  | 40 |
| H13B | 5314 | 5065 | 9325  | 40 |
| H24  | 8607 | 7108 | 8013  | 34 |
| H23  | 8151 | 7425 | 6898  | 38 |
| H10  | 5462 | 6651 | 3892  | 50 |
| H9   | 1981 | 6045 | 4108  | 46 |

## Experimental

Single crystals of Complex 5, C<sub>24</sub>H<sub>28</sub>N<sub>2</sub>O<sub>4</sub>Pd [dh1-171b] were [crystallized from water/acetone]. A suitable crystal was selected and [mounted on fiber loop] on a Oxford Diffraction Nova diffractometer. The crystal was kept at 100.15 K during data collection. Using Olex2 [1], the structure was solved with the ShelXS-1997 [2] structure solution program using Direct Methods and refined with the ShelXL [3] refinement package using Least Squares minimisation.

1. Dolomanov, O.V., Bourhis, L.J., Gildea, R.J., Howard, J.A.K. & Puschmann, H. (2009), J. Appl. Cryst. 42, 339-341.
2. Sheldrick, G.M. (2008). Acta Cryst. A64, 112-122.
3. Sheldrick, G.M. (2015). Acta Cryst. C71, 3-8.

## Crystal structure determination of [dh1-171b]

**Crystal Data** for **Complex 5**, C<sub>24</sub>H<sub>28</sub>N<sub>2</sub>O<sub>4</sub>Pd (*M* = 514.88 g/mol): orthorhombic, space group P2<sub>1</sub>2<sub>1</sub>2<sub>1</sub> (no. 19), *a* = 5.72249(19) Å, *b* = 18.6628(7) Å, *c* = 20.0836(7) Å, *V* = 2144.89(13) Å<sup>3</sup>, *Z* = 4, *T* = 100.15 K, μ(CuKα) = 7.262 mm<sup>-1</sup>, *D*<sub>calc</sub> = 1.594 g/cm<sup>3</sup>, 10868 reflections measured (6.466° ≤ 2Θ ≤ 149.698°), 4221 unique (*R*<sub>int</sub> = 0.0862, *R*<sub>sigma</sub> = 0.0704) which were used in all calculations. The final *R*<sub>1</sub> was 0.0477 (*I* > 2σ(*I*)) and *wR*<sub>2</sub> was 0.1310 (all data).

## Refinement model description

Number of restraints - 0, number of constraints - unknown.

Details:



## 1. Fixed Uiso

At 1.2 times of:

All C(H) groups, All C(H,H) groups, All N(H) groups

## 2.a Ternary CH refined with riding coordinates:

N1(H1), N2(H2)

## 2.b Secondary CH2 refined with riding coordinates:

C18(H18A,H18B), C1(H1A,H1B), C2(H2A,H2B), C3(H3A,H3B), C6(H6A,H6B), C15(H15A,  
H15B), C14(H14A,H14B), C13(H13A,H13B)

## 2.c Aromatic/amide H refined with riding coordinates:

C22(H22), C21(H21), C20(H20), C8(H8), C12(H12), C11(H11), C24(H24), C23(H23),  
C10(H10), C9(H9)

This report has been created with Olex2,

**Report VI. Experimental Details and Bond Lengths and Angles for Complex 7.**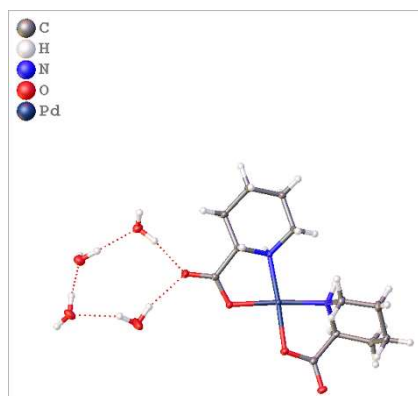**Table 1 Crystal data and structure refinement for DH1-143, Complex 7.**

|                                    |                                                                  |
|------------------------------------|------------------------------------------------------------------|
| Identification code                | DH1-143                                                          |
| Empirical formula                  | C <sub>12</sub> H <sub>28</sub> N <sub>2</sub> O <sub>8</sub> Pd |
| Formula weight                     | 434.76                                                           |
| Temperature/K                      | 100.1                                                            |
| Crystal system                     | monoclinic                                                       |
| Space group                        | C2                                                               |
| a/Å                                | 22.3125(15)                                                      |
| b/Å                                | 7.5996(3)                                                        |
| c/Å                                | 11.8862(8)                                                       |
| α/°                                | 90                                                               |
| β/°                                | 120.134(9)                                                       |
| γ/°                                | 90                                                               |
| Volume/Å <sup>3</sup>              | 1743.1(2)                                                        |
| Z                                  | 4                                                                |
| ρ <sub>calc</sub> /cm <sup>3</sup> | 1.657                                                            |

|                                                |                                                               |
|------------------------------------------------|---------------------------------------------------------------|
| $\mu/\text{mm}^{-1}$                           | 1.105                                                         |
| F(000)                                         | 896.0                                                         |
| Crystal size/ $\text{mm}^3$                    | $0.7273 \times 0.3616 \times 0.1707$                          |
| Radiation                                      | MoK $\alpha$ ( $\lambda = 0.71073$ )                          |
| $2\Theta$ range for data collection/ $^\circ$  | 7.31 to 64.902                                                |
| Index ranges                                   | $-31 \leq h \leq 33, -11 \leq k \leq 11, -17 \leq l \leq 17$  |
| Reflections collected                          | 18752                                                         |
| Independent reflections                        | 5852 [ $R_{\text{int}} = 0.0316, R_{\text{sigma}} = 0.0346$ ] |
| Data/restraints/parameters                     | 5852/1/221                                                    |
| Goodness-of-fit on $F^2$                       | 1.078                                                         |
| Final R indexes [ $I \geq 2\sigma(I)$ ]        | $R_1 = 0.0211, wR_2 = 0.0503$                                 |
| Final R indexes [all data]                     | $R_1 = 0.0233, wR_2 = 0.0526$                                 |
| Largest diff. peak/hole / $e \text{ \AA}^{-3}$ | 0.54/-0.52                                                    |
| Flack parameter                                | -0.044(13)                                                    |

**Table 2 Fractional Atomic Coordinates ( $\times 10^4$ ) and Equivalent Isotropic Displacement Parameters ( $\text{\AA}^2 \times 10^3$ ) for DH1-143 Complex 7.  $U_{\text{eq}}$  is defined as 1/3 of of the trace of the orthogonalised  $U_{ij}$  tensor.**

| Atom | $x$        | $y$       | $z$         | $U(\text{eq})$ |
|------|------------|-----------|-------------|----------------|
| Pd1  | 7728.5(2)  | 9391.6(4) | 9191.5(2)   | 10.14(5)       |
| O1   | 6912.7(9)  | 9555(5)   | 7371.0(16)  | 13.8(5)        |
| O2   | 6637.6(9)  | 9584(4)   | 5297.6(16)  | 20.5(5)        |
| O3   | 7178.9(10) | 10067(3)  | 10064.1(18) | 14.7(4)        |
| O4   | 7245.9(10) | 10068(3)  | 11995.4(18) | 16.8(4)        |
| N1   | 8222.1(11) | 8672(3)   | 8234(2)     | 12.0(4)        |
| N2   | 8507.6(10) | 9272(6)   | 11060.2(18) | 12.6(4)        |
| C1   | 8984.1(13) | 8931(4)   | 8829(2)     | 17.0(6)        |
| C2   | 9232.5(14) | 8152(4)   | 7949(3)     | 18.3(6)        |
| C3   | 8837.6(14) | 8915(4)   | 6577(2)     | 17.0(6)        |
| C4   | 8055.3(14) | 8711(4)   | 6005(3)     | 17.7(5)        |
| C5   | 7844.7(12) | 9527(6)   | 6925(2)     | 12.1(5)        |
| C6   | 7071.3(12) | 9530(6)   | 6463(2)     | 13.9(5)        |
| C7   | 8862.8(14) | 11003(4)  | 11505(2)    | 16.1(5)        |
| C8   | 9381.1(15) | 10997(4)  | 12962(3)    | 19.5(6)        |
| C9   | 9015.3(16) | 10571(4)  | 13717(3)    | 20.1(6)        |
| C10  | 8655.6(16) | 8801(4)   | 13282(3)    | 17.5(5)        |
| C11  | 8171.1(14) | 8702(4)   | 11815(2)    | 13.1(5)        |
| C12  | 7491.0(14) | 9694(4)   | 11295(2)    | 14.4(7)        |

|    |            |          |         |         |
|----|------------|----------|---------|---------|
| O5 | 6446.9(11) | 8454(3)  | 2936(2) | 20.0(4) |
| O6 | 5043.6(12) | 8262(3)  | 1178(2) | 24.9(5) |
| O7 | 4266.1(11) | 10949(3) | 1434(2) | 22.3(4) |
| O8 | 5208.4(12) | 10646(5) | 4120(2) | 44.6(8) |

**Table 3** Anisotropic Displacement Parameters ( $\text{\AA}^2 \times 10^3$ ) for DH1-143, Complex 7. The Anisotropic displacement factor exponent takes the form:  $-2\pi^2[h^2a^{*2}U_{11}+2hka^*b^*U_{12}+\dots]$ .

| Atom | $U_{11}$ | $U_{22}$ | $U_{33}$ | $U_{23}$ | $U_{13}$ | $U_{12}$ |
|------|----------|----------|----------|----------|----------|----------|
| Pd1  | 9.47(8)  | 13.65(8) | 8.16(8)  | 0.67(9)  | 5.07(6)  | 0.73(9)  |
| O1   | 11.0(7)  | 20.4(15) | 10.0(7)  | 0.5(9)   | 5.3(6)   | 0.8(10)  |
| O2   | 13.2(8)  | 37.2(16) | 10.1(7)  | 1.1(10)  | 5.3(6)   | 4.2(11)  |
| O3   | 14.3(9)  | 19.5(9)  | 12.2(8)  | 0.2(7)   | 8.1(7)   | 1.5(7)   |
| O4   | 19.1(10) | 21.1(9)  | 15.6(9)  | 0.1(8)   | 12.8(8)  | -0.4(8)  |
| N1   | 11.2(10) | 16.4(10) | 9.0(9)   | 2.3(8)   | 5.4(8)   | 2.3(8)   |
| N2   | 11.9(8)  | 17.3(13) | 9.6(8)   | 1.9(13)  | 6.2(6)   | 3.9(13)  |
| C1   | 9.3(11)  | 29.7(17) | 11.1(11) | 1.0(9)   | 4.5(9)   | 3.1(9)   |
| C2   | 11.8(12) | 30.3(15) | 14.3(12) | 2.2(11)  | 7.6(10)  | 4.6(11)  |
| C3   | 13.5(12) | 26.3(16) | 13.0(11) | 1.5(9)   | 7.9(10)  | 2.5(9)   |
| C4   | 13.2(12) | 28.9(14) | 12.2(12) | -0.7(10) | 7.2(10)  | 2.3(10)  |
| C5   | 10.2(9)  | 16.4(15) | 9.6(8)   | 1.7(12)  | 4.8(7)   | 1.2(13)  |
| C6   | 11.5(9)  | 17.8(14) | 12.9(9)  | -0.6(12) | 6.6(8)   | 1.1(13)  |
| C7   | 15.1(12) | 20.4(13) | 12.2(12) | -0.4(10) | 6.4(10)  | -2.7(10) |
| C8   | 15.3(13) | 25.3(15) | 14.1(12) | -1.0(11) | 4.4(10)  | -3.1(11) |
| C9   | 20.0(14) | 27.9(15) | 10.1(12) | -2.1(11) | 5.7(11)  | 1.8(12)  |
| C10  | 20.0(13) | 22.9(13) | 10.7(11) | 5.2(10)  | 8.5(11)  | 4.5(10)  |
| C11  | 16.8(12) | 13.5(11) | 12.0(11) | 1.2(9)   | 9.5(10)  | 0.6(10)  |
| C12  | 13.7(10) | 18(2)    | 12.7(10) | -1.2(9)  | 7.4(9)   | -2.3(9)  |
| O5   | 21.0(10) | 24.4(11) | 17.5(10) | -1.4(8)  | 11.8(8)  | -1.8(8)  |
| O6   | 19.5(10) | 30.4(12) | 26.4(11) | -2.4(9)  | 12.7(9)  | -2.0(9)  |
| O7   | 13.1(10) | 23.9(11) | 29.2(12) | 1.7(9)   | 10.0(9)  | 2.4(8)   |
| O8   | 15.4(11) | 88(2)    | 28.6(13) | 19.5(14) | 10.0(10) | 9.7(14)  |

**Table 4** Bond Lengths for DH1-143, Complex 7.

| Atom Atom | Length/ $\text{\AA}$ | Atom Atom | Length/ $\text{\AA}$ |
|-----------|----------------------|-----------|----------------------|
|-----------|----------------------|-----------|----------------------|

|     |     |            |     |     |          |
|-----|-----|------------|-----|-----|----------|
| Pd1 | O1  | 2.0141(17) | N2  | C11 | 1.494(3) |
| Pd1 | O3  | 2.0299(19) | C1  | C2  | 1.528(4) |
| Pd1 | N1  | 2.016(2)   | C2  | C3  | 1.526(4) |
| Pd1 | N2  | 2.0216(19) | C3  | C4  | 1.530(4) |
| O1  | C6  | 1.293(3)   | C4  | C5  | 1.522(4) |
| O2  | C6  | 1.230(3)   | C5  | C6  | 1.526(3) |
| O3  | C12 | 1.297(3)   | C7  | C8  | 1.525(4) |
| O4  | C12 | 1.237(3)   | C8  | C9  | 1.521(4) |
| N1  | C1  | 1.491(3)   | C9  | C10 | 1.518(4) |
| N1  | C5  | 1.496(3)   | C10 | C11 | 1.524(4) |
| N2  | C7  | 1.489(5)   | C11 | C12 | 1.520(4) |

Table 5 Bond Angles for DH1-143, Complex 7.

| Atom | Atom | Atom | Angle/°    | Atom | Atom | Atom | Angle/°    |
|------|------|------|------------|------|------|------|------------|
| O1   | Pd1  | O3   | 94.67(8)   | C5   | C4   | C3   | 109.5(2)   |
| O1   | Pd1  | N1   | 82.27(8)   | N1   | C5   | C4   | 110.8(3)   |
| O1   | Pd1  | N2   | 176.44(9)  | N1   | C5   | C6   | 108.6(2)   |
| N1   | Pd1  | O3   | 176.65(8)  | C4   | C5   | C6   | 116.3(2)   |
| N1   | Pd1  | N2   | 101.29(9)  | O1   | C6   | C5   | 115.71(19) |
| N2   | Pd1  | O3   | 81.77(8)   | O2   | C6   | O1   | 123.3(2)   |
| C6   | O1   | Pd1  | 114.65(15) | O2   | C6   | C5   | 120.9(2)   |
| C12  | O3   | Pd1  | 113.63(17) | N2   | C7   | C8   | 111.4(2)   |
| C1   | N1   | Pd1  | 120.83(16) | C9   | C8   | C7   | 110.2(2)   |
| C1   | N1   | C5   | 110.4(2)   | C10  | C9   | C8   | 109.7(2)   |
| C5   | N1   | Pd1  | 106.73(16) | C9   | C10  | C11  | 112.5(2)   |
| C7   | N2   | Pd1  | 111.2(2)   | N2   | C11  | C10  | 113.0(2)   |
| C7   | N2   | C11  | 112.4(3)   | N2   | C11  | C12  | 108.2(2)   |
| C11  | N2   | Pd1  | 104.98(15) | C12  | C11  | C10  | 115.5(2)   |
| N1   | C1   | C2   | 110.1(2)   | O3   | C12  | C11  | 115.3(2)   |
| C3   | C2   | C1   | 111.8(2)   | O4   | C12  | O3   | 122.7(2)   |
| C2   | C3   | C4   | 110.7(2)   | O4   | C12  | C11  | 121.9(2)   |

Table 6 Hydrogen Atom Coordinates ( $\text{\AA} \times 10^4$ ) and Isotropic Displacement Parameters ( $\text{\AA}^2 \times 10^3$ ) for DH1-143, Complex 7.

| Atom | x       | y        | z        | U(eq) |
|------|---------|----------|----------|-------|
| H1   | 8140.66 | 7379.35  | 8074.25  | 14    |
| H2   | 8850.73 | 8361.53  | 11141.99 | 15    |
| H1A  | 9228.21 | 8351.85  | 9691.33  | 20    |
| H1B  | 9093.31 | 10203.64 | 8955.87  | 20    |
| H2A  | 9733.19 | 8396.04  | 8328.13  | 22    |
| H2B  | 9169.32 | 6859.62  | 7904.58  | 22    |
| H3A  | 8980.17 | 8300.64  | 6014.17  | 20    |
| H3B  | 8953.27 | 10177.34 | 6602.12  | 20    |
| H4A  | 7805.65 | 9300.11  | 5147.12  | 21    |
| H4B  | 7929.95 | 7447.42  | 5878.78  | 21    |
| H5   | 7996.68 | 10784.6  | 7047.8   | 15    |
| H7A  | 8513.09 | 11934.46 | 11305.32 | 19    |
| H7B  | 9107.91 | 11277.72 | 11025.12 | 19    |
| H8A  | 9745.75 | 10109.72 | 13158.95 | 23    |
| H8B  | 9605.84 | 12164.98 | 13229.88 | 23    |
| H9A  | 9356.7  | 10538.23 | 14659.7  | 24    |
| H9B  | 8670.08 | 11496.99 | 13562.46 | 24    |
| H10A | 8386.2  | 8580.75  | 13723.1  | 21    |
| H10B | 9009.93 | 7864.02  | 13551.21 | 21    |
| H11  | 8048.08 | 7433.35  | 11601.7  | 16    |
| H5A  | 6728.51 | 9056.14  | 2778.73  | 30    |
| H5B  | 6556.79 | 8752.32  | 3723.5   | 30    |
| H6A  | 5472.7  | 8560.22  | 1700.72  | 37    |
| H6B  | 5049.99 | 7117.99  | 1165.7   | 37    |
| H7C  | 4512.32 | 10208.01 | 1277.02  | 33    |
| H7D  | 3864.31 | 10440.69 | 1125.32  | 33    |
| H8C  | 5615.39 | 10221.96 | 4345.09  | 67    |
| H8D  | 5054.96 | 11053.92 | 3338.74  | 67    |

## Experimental

Single crystals of Complex 7, C<sub>12</sub>H<sub>28</sub>N<sub>2</sub>O<sub>8</sub>Pd [DH1-143] were [crystallized from water/acetone]. A suitable crystal was selected and [mounted on a fiber loop] on a Xcalibur, Eos, Gemini ultra diffractometer. The crystal was kept at 100.1 K during data collection. Using Olex2 [1], the structure was solved with the ShelXS-1997 [2] structure solution program using Direct Methods and refined with the ShelXL [3] refinement package using Least Squares minimisation.

1. Dolomanov, O.V., Bourhis, L.J., Gildea, R.J., Howard, J.A.K. & Puschmann, H. (2009), J. Appl. Cryst. 42, 339-341.
2. Sheldrick, G.M. (2008). Acta Cryst. A64, 112-122.

3. Sheldrick, G.M. (2015). Acta Cryst. C71, 3-8.

### Crystal structure determination of [DH1-143]

Crystal Data for Complex 7,  $C_{12}H_{28}N_2O_8Pd$  ( $M = 434.76$  g/mol): monoclinic, space group C2 (no. 5),  $a = 22.3125(15)$  Å,  $b = 7.5996(3)$  Å,  $c = 11.8862(8)$  Å,  $\beta = 120.134(9)^\circ$ ,  $V = 1743.1(2)$  Å<sup>3</sup>,  $Z = 4$ ,  $T = 100.1$  K,  $\mu(MoK\alpha) = 1.105$  mm<sup>-1</sup>,  $D_{calc} = 1.657$  g/cm<sup>3</sup>, 18752 reflections measured ( $7.31^\circ \leq 2\Theta \leq 64.902^\circ$ ), 5852 unique ( $R_{int} = 0.0316$ ,  $R_{sigma} = 0.0346$ ) which were used in all calculations. The final  $R_1$  was 0.0211 ( $I > 2\sigma(I)$ ) and  $wR_2$  was 0.0526 (all data).

### Refinement model description

Number of restraints - 1, number of constraints - unknown.

Details:

1. Fixed Uiso

At 1.2 times of:

All C(H) groups, All C(H,H) groups, All N(H) groups

At 1.5 times of:

All O(H,H) groups

2.a Free rotating group:

O5(H5A,H5B), O6(H6A,H6B), O7(H7C,H7D), O8(H8C,H8D)

2.b Ternary CH refined with riding coordinates:

N1(H1), N2(H2), C5(H5), C11(H11)

2.c Secondary CH2 refined with riding coordinates:

C1(H1A,H1B), C2(H2A,H2B), C3(H3A,H3B), C4(H4A,H4B), C7(H7A,H7B), C8(H8A,H8B),  
C9(H9A,H9B), C10(H10A,H10B)

This report has been created with Olex2, compiled on 2018.05.29 svn.r3508 for OlexSys. Please [let us know](#) if there are any errors or if you would like to have additional features.

### Report VII. Experimental Details and Bond Lengths and Angles for Complex 8.

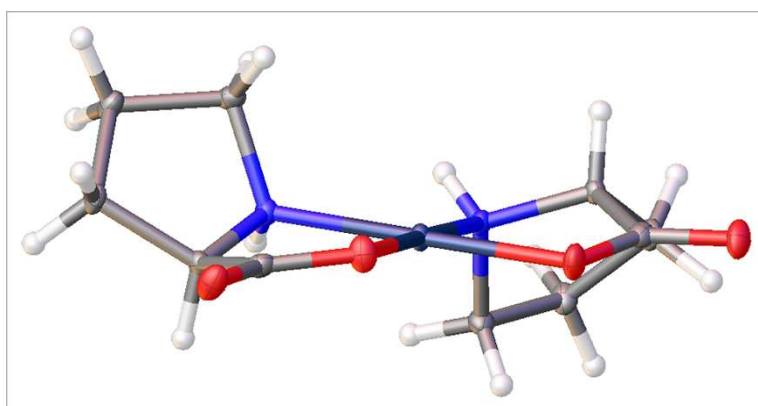

Table 1 Crystal data and structure refinement for dh1-191\_abs, Complex 8.

|                     |                        |
|---------------------|------------------------|
| Identification code | dh1-191_abs            |
| Empirical formula   | $C_{10}H_{16}N_2O_4Pd$ |
| Formula weight      | 334.65                 |

|                                             |                                                               |
|---------------------------------------------|---------------------------------------------------------------|
| Temperature/K                               | 100.15                                                        |
| Crystal system                              | orthorhombic                                                  |
| Space group                                 | C222 <sub>1</sub>                                             |
| a/Å                                         | 9.6749(2)                                                     |
| b/Å                                         | 10.3124(2)                                                    |
| c/Å                                         | 11.9527(3)                                                    |
| $\alpha$ /°                                 | 90                                                            |
| $\beta$ /°                                  | 90                                                            |
| $\gamma$ /°                                 | 90                                                            |
| Volume/Å <sup>3</sup>                       | 1192.53(5)                                                    |
| Z                                           | 4                                                             |
| $\rho_{\text{calc}}/\text{cm}^3$            | 1.864                                                         |
| $\mu/\text{mm}^{-1}$                        | 1.561                                                         |
| F(000)                                      | 672.0                                                         |
| Crystal size/mm <sup>3</sup>                | 0.265 × 0.1648 × 0.0759                                       |
| Radiation                                   | MoK $\alpha$ ( $\lambda$ = 0.71073)                           |
| 2 $\Theta$ range for data collection/°      | 7.904 to 64.796                                               |
| Index ranges                                | -14 ≤ h ≤ 14, -14 ≤ k ≤ 15, -17 ≤ l ≤ 17                      |
| Reflections collected                       | 12233                                                         |
| Independent reflections                     | 2045 [R <sub>int</sub> = 0.0516, R <sub>sigma</sub> = 0.0360] |
| Data/restraints/parameters                  | 2045/0/82                                                     |
| Goodness-of-fit on F <sup>2</sup>           | 1.053                                                         |
| Final R indexes [I ≥ 2 $\sigma$ (I)]        | R <sub>1</sub> = 0.0219, wR <sub>2</sub> = 0.0424             |
| Final R indexes [all data]                  | R <sub>1</sub> = 0.0257, wR <sub>2</sub> = 0.0441             |
| Largest diff. peak/hole / e Å <sup>-3</sup> | 0.70/-0.57                                                    |
| Flack parameter                             | -0.02(3)                                                      |

**Table 2 Fractional Atomic Coordinates (×10<sup>4</sup>) and Equivalent Isotropic Displacement Parameters (Å<sup>2</sup>×10<sup>3</sup>) for dh1-191\_abs, Complex 8. U<sub>eq</sub> is defined as 1/3 of of the trace of the orthogonalised U<sub>ij</sub> tensor.**

| Atom | x       | y          | z          | U(eq)   |
|------|---------|------------|------------|---------|
| Pd1  | 0       | 4386.4(2)  | 2500       | 9.69(7) |
| O1   | 1433(2) | 5692.7(19) | 2987.5(17) | 15.5(4) |
| O2   | 3671(2) | 5878.3(19) | 3383.4(18) | 17.0(4) |
| N1   | 1443(2) | 3117(2)    | 3009.1(19) | 10.4(4) |
| C1   | 2658(3) | 5213(3)    | 3145(2)    | 12.6(5) |
| C2   | 2830(3) | 3756(2)    | 2961(2)    | 10.5(5) |
| C3   | 3737(3) | 3087(3)    | 3856(2)    | 13.5(5) |

|    |         |         |         |         |
|----|---------|---------|---------|---------|
| C4 | 2764(3) | 2141(3) | 4458(2) | 14.8(5) |
| C5 | 1319(3) | 2645(3) | 4190(2) | 13.5(5) |

**Table 3** Anisotropic Displacement Parameters ( $\text{\AA}^2 \times 10^3$ ) for dh1-191\_abs, Complex 8. The Anisotropic displacement factor exponent takes the form:  $-2\pi^2[h^2a^*U_{11}+2hka^*b^*U_{12}+\dots]$ .

| Atom | $U_{11}$ | $U_{22}$ | $U_{33}$  | $U_{23}$ | $U_{13}$  | $U_{12}$ |
|------|----------|----------|-----------|----------|-----------|----------|
| Pd1  | 8.33(10) | 7.60(10) | 13.15(12) | 0        | -1.28(16) | 0        |
| O1   | 13.1(9)  | 10.5(9)  | 23.0(10)  | -2.8(8)  | -3.2(7)   | -2.2(8)  |
| O2   | 16.3(9)  | 12.7(10) | 22.0(11)  | 4.6(8)   | -5.4(8)   | -5.2(8)  |
| N1   | 9.5(10)  | 9.8(10)  | 11.7(10)  | -1.1(9)  | -1.3(8)   | -0.4(9)  |
| C1   | 15.8(13) | 11.4(12) | 10.6(12)  | 1.2(10)  | 0.0(10)   | -2.5(10) |
| C2   | 8.1(11)  | 11.5(12) | 11.9(12)  | -0.1(10) | -0.6(10)  | -0.4(9)  |
| C3   | 11.1(11) | 14.4(12) | 15.0(13)  | 2.0(11)  | -4.2(10)  | -0.2(11) |
| C4   | 14.3(12) | 15.3(13) | 14.7(14)  | 4.5(11)  | -3.3(11)  | -1.4(10) |
| C5   | 13.4(12) | 16.0(13) | 11.2(12)  | 2.0(10)  | 0.3(10)   | -2.7(10) |

**Table 4** Bond Lengths for dh1-191\_abs, Complex 8.

| Atom | Atom            | Length/ $\text{\AA}$ | Atom | Atom | Length/ $\text{\AA}$ |
|------|-----------------|----------------------|------|------|----------------------|
| Pd1  | O1 <sup>1</sup> | 2.0187(19)           | N1   | C2   | 1.497(3)             |
| Pd1  | O1              | 2.0187(19)           | N1   | C5   | 1.497(3)             |
| Pd1  | N1 <sup>1</sup> | 2.008(2)             | C1   | C2   | 1.527(4)             |
| Pd1  | N1              | 2.008(2)             | C2   | C3   | 1.546(4)             |
| O1   | C1              | 1.298(3)             | C3   | C4   | 1.535(4)             |
| O2   | C1              | 1.230(3)             | C4   | C5   | 1.526(4)             |

<sup>1</sup>-X,+Y,1/2-Z

**Table 5** Bond Angles for dh1-191\_abs, Complex 8.

| Atom            | Atom | Atom            | Angle/ $^\circ$ | Atom | Atom | Atom | Angle/ $^\circ$ |
|-----------------|------|-----------------|-----------------|------|------|------|-----------------|
| O1 <sup>1</sup> | Pd1  | O1              | 96.28(12)       | O1   | C1   | C2   | 117.0(2)        |
| N1 <sup>1</sup> | Pd1  | O1 <sup>1</sup> | 82.56(8)        | O2   | C1   | O1   | 123.3(3)        |
| N1              | Pd1  | O1 <sup>1</sup> | 178.71(9)       | O2   | C1   | C2   | 119.6(3)        |
| N1              | Pd1  | O1              | 82.56(8)        | N1   | C2   | C1   | 109.3(2)        |
| N1 <sup>1</sup> | Pd1  | O1              | 178.71(9)       | N1   | C2   | C3   | 106.6(2)        |



|                 |     |     |            |    |    |    |          |
|-----------------|-----|-----|------------|----|----|----|----------|
| N1 <sup>1</sup> | Pd1 | N1  | 98.61(13)  | C1 | C2 | C3 | 113.7(2) |
| C1              | O1  | Pd1 | 114.48(17) | C4 | C3 | C2 | 105.1(2) |
| C2              | N1  | Pd1 | 108.93(16) | C5 | C4 | C3 | 104.3(2) |
| C2              | N1  | C5  | 104.5(2)   | N1 | C5 | C4 | 103.6(2) |
| C5              | N1  | Pd1 | 116.22(17) |    |    |    |          |

<sup>1</sup>-X,+Y,1/2-Z

**Table 6 Hydrogen Atom Coordinates (Å×10<sup>4</sup>) and Isotropic Displacement Parameters (Å<sup>2</sup>×10<sup>3</sup>) for dh1-191\_abs, Complex 8.**

| Atom | x        | y        | z        | U(eq) |
|------|----------|----------|----------|-------|
| H1   | 1410(30) | 2480(30) | 2550(40) | 14(7) |
| H2   | 3246     | 3605     | 2206     | 13    |
| H3A  | 4514     | 2615     | 3502     | 16    |
| H3B  | 4117     | 3732     | 4387     | 16    |
| H4A  | 2888     | 1247     | 4174     | 18    |
| H4B  | 2933     | 2147     | 5275     | 18    |
| H5A  | 623      | 1944     | 4249     | 16    |
| H5B  | 1057     | 3360     | 4700     | 16    |

## Experimental

Single crystals of Complex 8, C<sub>10</sub>H<sub>16</sub>N<sub>2</sub>O<sub>4</sub>Pd [dh1-191\_abs] were [crystallized from water/acetone]. A suitable crystal was selected and [mounted on fiber loop] on a Oxford Diffraction Gemini Ultra diffractometer. The crystal was kept at 100.15 K during data collection. Using Olex2 [1], the structure was solved with the ShelXS [2] structure solution program using Direct Methods and refined with the ShelXL [3] refinement package using Least Squares minimisation.

1. Dolomanov, O.V., Bourhis, L.J., Gildea, R.J., Howard, J.A.K. & Puschmann, H. (2009), J. Appl. Cryst. 42, 339-341.
2. Sheldrick, G.M. (2008). Acta Cryst. A64, 112-122.
3. Sheldrick, G.M. (2015). Acta Cryst. C71, 3-8.

## Crystal structure determination of [dh1-191\_abs]

Crystal Data for Complex 8, C<sub>10</sub>H<sub>16</sub>N<sub>2</sub>O<sub>4</sub>Pd (*M* = 334.65 g/mol): orthorhombic, space group C222<sub>1</sub> (no. 20), *a* = 9.6749(2) Å, *b* = 10.3124(2) Å, *c* = 11.9527(3) Å, *V* = 1192.53(5) Å<sup>3</sup>, *Z* = 4, *T* = 100.15 K, μ(MoKα) = 1.561 mm<sup>-1</sup>, *D*<sub>calc</sub> = 1.864 g/cm<sup>3</sup>, 12233 reflections measured (7.904° ≤ 2θ ≤ 64.796°), 2045 unique (*R*<sub>int</sub> = 0.0516, *R*<sub>sigma</sub> = 0.0360) which were used in all calculations. The final *R*<sub>1</sub> was 0.0219 (*I* > 2σ(*I*)) and *wR*<sub>2</sub> was 0.0441 (all data).

## Refinement model description

Number of restraints - 0, number of constraints - unknown.

Details:

## 1. Fixed Uiso

At 1.2 times of:

All C(H) groups, All C(H,H) groups

## 2.a Ternary CH refined with riding coordinates:

C2(H2)

## 2.b Secondary CH2 refined with riding coordinates:

C3(H3A,H3B), C4(H4A,H4B), C5(H5A,H5B)

This report has been created with Olex2, compiled on 2018.05.29 svn.r3508 for OlexSys. Please [let us know](#) if there are any errors or if you would like to have additional features.

VIII. Experimental Details and Bond Lengths and Angles for Complex **9**.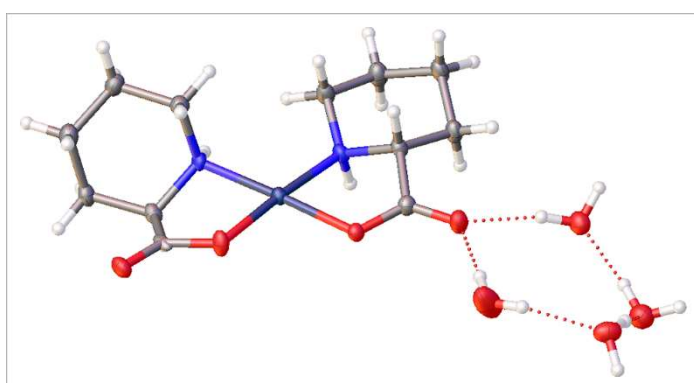

**Table 1** Crystal data and structure refinement for dh1-189\_ABS.

|                                    |                                                                  |
|------------------------------------|------------------------------------------------------------------|
| Identification code                | dh1-189_ABS                                                      |
| Empirical formula                  | C <sub>12</sub> H <sub>28</sub> N <sub>2</sub> O <sub>8</sub> Pd |
| Formula weight                     | 434.76                                                           |
| Temperature/K                      | 100.15                                                           |
| Crystal system                     | monoclinic                                                       |
| Space group                        | C2                                                               |
| a/Å                                | 23.0490(7)                                                       |
| b/Å                                | 7.60778(14)                                                      |
| c/Å                                | 11.8928(2)                                                       |
| α/°                                | 90                                                               |
| β/°                                | 123.0605(13)                                                     |
| γ/°                                | 90                                                               |
| Volume/Å <sup>3</sup>              | 1747.78(7)                                                       |
| Z                                  | 4                                                                |
| ρ <sub>calc</sub> /cm <sup>3</sup> | 1.652                                                            |
| μ/mm <sup>-1</sup>                 | 1.102                                                            |
| F(000)                             | 896.0                                                            |
| Crystal size/mm <sup>3</sup>       | 0.1936 × 0.1643 × 0.1225                                         |

|                                                  |                                                               |
|--------------------------------------------------|---------------------------------------------------------------|
| Radiation                                        | MoK $\alpha$ ( $\lambda = 0.71073$ )                          |
| 2 $\Theta$ range for data collection/ $^{\circ}$ | 7.09 to 64.8                                                  |
| Index ranges                                     | $-33 \leq h \leq 33, -11 \leq k \leq 11, -17 \leq l \leq 17$  |
| Reflections collected                            | 18977                                                         |
| Independent reflections                          | 5827 [ $R_{\text{int}} = 0.0320, R_{\text{sigma}} = 0.0331$ ] |
| Data/restraints/parameters                       | 5827/6/229                                                    |
| Goodness-of-fit on $F^2$                         | 1.082                                                         |
| Final R indexes [ $I \geq 2\sigma(I)$ ]          | $R_1 = 0.0341, wR_2 = 0.0855$                                 |
| Final R indexes [all data]                       | $R_1 = 0.0373, wR_2 = 0.0888$                                 |
| Largest diff. peak/hole / e $\text{\AA}^{-3}$    | 2.47/-0.94                                                    |
| Flack parameter                                  | -0.009(13)                                                    |

**Table 2** Fractional Atomic Coordinates ( $\times 10^4$ ) and Equivalent Isotropic Displacement Parameters ( $\text{\AA}^2 \times 10^3$ ) for dh1-189\_ABS, Complex 9.  $U_{\text{eq}}$  is defined as 1/3 of the trace of the orthogonalised  $U_{ij}$  tensor.

| Atom | $x$        | $y$       | $z$       | $U(\text{eq})$ |
|------|------------|-----------|-----------|----------------|
| Pd1  | 2727.6(2)  | 2385.5(5) | 6267.4(2) | 15.62(8)       |
| O1   | 1914.5(13) | 2542(8)   | 6453(3)   | 16.1(7)        |
| O2   | 1635.4(15) | 2578(7)   | 7983(3)   | 25.6(8)        |
| O3   | 2173.8(16) | 3044(5)   | 4284(3)   | 22.7(6)        |
| O4   | 2248.2(17) | 3060(5)   | 2500(3)   | 23.6(6)        |
| O5   | 1443.6(19) | 1445(5)   | 9956(4)   | 28.1(7)        |
| O7   | 730.9(18)  | 3936(5)   | 2884(4)   | 29.6(7)        |
| N1   | 3221.7(18) | 1670(5)   | 8215(3)   | 17.4(6)        |
| N2   | 3504.5(15) | 2305(10)  | 5964(3)   | 16.1(6)        |
| C1   | 2068.1(19) | 2522(9)   | 7674(4)   | 19.4(7)        |
| C2   | 2841.7(19) | 2533(9)   | 8762(4)   | 17.6(8)        |
| C3   | 3053(2)    | 1703(7)   | 10114(4)  | 24.1(8)        |
| C4   | 3839(2)    | 1911(6)   | 11109(4)  | 24.8(9)        |
| C5   | 4232(2)    | 1155(7)   | 10520(5)  | 26.2(9)        |
| C6   | 3984(2)    | 1927(6)   | 9145(4)   | 22.6(9)        |
| C7   | 2509(2)    | 2659(5)   | 3694(4)   | 16.4(9)        |
| C8   | 3176(2)    | 1693(6)   | 4539(4)   | 20.3(7)        |
| C9   | 3655(3)    | 1797(6)   | 4027(5)   | 22.8(8)        |
| C10  | 4016(3)    | 3559(7)   | 4324(5)   | 27.4(9)        |
| C11  | 4380(2)    | 4000(7)   | 5805(5)   | 25.8(9)        |
| C12  | 3861(2)    | 4011(6)   | 6224(4)   | 20.9(8)        |
| O6   | -46(2)     | 1247(6)   | 1085(4)   | 34.3(8)        |



|     |    |          |     |     |          |
|-----|----|----------|-----|-----|----------|
| Pd1 | O1 | 2.007(3) | N2  | C12 | 1.476(8) |
| Pd1 | O3 | 2.039(3) | C1  | C2  | 1.529(5) |
| Pd1 | N1 | 2.020(3) | C2  | C3  | 1.539(6) |
| Pd1 | N2 | 2.012(3) | C3  | C4  | 1.539(6) |
| O1  | C1 | 1.293(4) | C4  | C5  | 1.529(6) |
| O2  | C1 | 1.237(5) | C5  | C6  | 1.525(6) |
| O3  | C7 | 1.330(5) | C7  | C8  | 1.492(6) |
| O4  | C7 | 1.241(5) | C8  | C9  | 1.527(6) |
| N1  | C2 | 1.498(5) | C9  | C10 | 1.515(7) |
| N1  | C6 | 1.492(5) | C10 | C11 | 1.518(7) |
| N2  | C8 | 1.504(6) | C11 | C12 | 1.527(6) |

Table 5 Bond Angles for dh1-189\_ABS, Complex 9.

| Atom | Atom | Atom | Angle/°    | Atom | Atom | Atom | Angle/°  |
|------|------|------|------------|------|------|------|----------|
| O1   | Pd1  | O3   | 94.58(12)  | N1   | C2   | C1   | 108.6(4) |
| O1   | Pd1  | N1   | 82.29(13)  | N1   | C2   | C3   | 110.3(4) |
| O1   | Pd1  | N2   | 176.27(19) | C1   | C2   | C3   | 116.1(4) |
| N1   | Pd1  | O3   | 176.44(13) | C2   | C3   | C4   | 109.2(4) |
| N2   | Pd1  | O3   | 81.76(13)  | C5   | C4   | C3   | 110.7(4) |
| N2   | Pd1  | N1   | 101.39(14) | C6   | C5   | C4   | 112.1(4) |
| C1   | O1   | Pd1  | 115.0(2)   | N1   | C6   | C5   | 110.2(3) |
| C7   | O3   | Pd1  | 112.3(2)   | O3   | C7   | C8   | 115.8(3) |
| C2   | N1   | Pd1  | 106.4(3)   | O4   | C7   | O3   | 119.4(4) |
| C6   | N1   | Pd1  | 120.9(3)   | O4   | C7   | C8   | 124.7(4) |
| C6   | N1   | C2   | 110.6(3)   | N2   | C8   | C9   | 113.8(4) |
| C8   | N2   | Pd1  | 105.1(2)   | C7   | C8   | N2   | 107.9(4) |
| C12  | N2   | Pd1  | 112.6(4)   | C7   | C8   | C9   | 114.2(4) |
| C12  | N2   | C8   | 112.9(4)   | C10  | C9   | C8   | 112.2(4) |
| O1   | C1   | C2   | 115.4(3)   | C9   | C10  | C11  | 110.5(4) |
| O2   | C1   | O1   | 124.1(3)   | C10  | C11  | C12  | 110.2(4) |
| O2   | C1   | C2   | 120.4(3)   | N2   | C12  | C11  | 111.8(4) |

Table 6 Hydrogen Bonds for dh1-189\_ABS, Complex 9.

| D | H | A | d(D-H)/Å | d(H-A)/Å | d(D-A)/Å | D-H-A/° |
|---|---|---|----------|----------|----------|---------|
|---|---|---|----------|----------|----------|---------|

|                       |         |         |          |        |
|-----------------------|---------|---------|----------|--------|
| O5H5C O4 <sup>1</sup> | 0.87    | 1.96    | 2.825(5) | 178.6  |
| O5H5D O2              | 0.87    | 1.91    | 2.753(5) | 161.7  |
| O7H7B O3              | 0.87    | 2.04    | 2.873(5) | 161.4  |
| O8H8A O2 <sup>2</sup> | 1.12(8) | 1.77(8) | 2.879(5) | 170(7) |
| O8H8B O7              | 0.87    | 2.00    | 2.821(6) | 157.1  |

<sup>1</sup>+X,+Y,1+Z; <sup>2</sup>-X,+Y,1-Z

**Table 7 Hydrogen Atom Coordinates (Å×10<sup>4</sup>) and Isotropic Displacement Parameters (Å<sup>2</sup>×10<sup>3</sup>) for dh1-189\_ABS, Complex 9.**

| Atom | x        | y         | z        | U(eq)   |
|------|----------|-----------|----------|---------|
| H5C  | 1695.41  | 1951.29   | 10734.7  | 42      |
| H5D  | 1590.95  | 1884.02   | 9480.96  | 42      |
| H7A  | 494.75   | 3234.63   | 2202.73  | 44      |
| H7B  | 1137.95  | 3453.24   | 3360.12  | 44      |
| H1   | 3139.39  | 379.35    | 8214.28  | 21      |
| H2   | 3848.76  | 1403.02   | 6576.06  | 19      |
| H2A  | 2992.23  | 3790.4    | 8941.69  | 21      |
| H3A  | 2927.95  | 440.39    | 9987.8   | 29      |
| H3B  | 2803.13  | 2288.4    | 10473.72 | 29      |
| H4A  | 3953.3   | 3172.64   | 11315.46 | 30      |
| H4B  | 3982.74  | 1295.03   | 11955.69 | 30      |
| H5A  | 4732.22  | 1401.76   | 11139.43 | 31      |
| H5B  | 4170.81  | -136.94   | 10439.81 | 31      |
| H6A  | 4093.17  | 3197.41   | 9234.53  | 27      |
| H6B  | 4227.25  | 1345.17   | 8771.34  | 27      |
| H8   | 3056.1   | 424.67    | 4517.4   | 24      |
| H9A  | 4007.79  | 855.51    | 4453.4   | 27      |
| H9B  | 3382.37  | 1593.38   | 3046.11  | 27      |
| H10A | 3672.48  | 4484.55   | 3785.1   | 33      |
| H10B | 4359.02  | 3525.99   | 4067.35  | 33      |
| H11A | 4602.91  | 5167.59   | 5978.78  | 31      |
| H11B | 4745.67  | 3118.12   | 6341.41  | 31      |
| H12A | 4106.76  | 4286.06   | 7193.25  | 25      |
| H12B | 3513.94  | 4945.18   | 5725.36  | 25      |
| H8A  | -740(40) | 3090(110) | 3030(80) | 60(20)  |
| H6C  | -510(20) | 1320(110) | 710(70)  | 50(20)  |
| H6D  | 310(30)  | 1350(160) | 920(60)  | 150(60) |
| H8B  | 88.18    | 4020.06   | 3522.51  | 80      |

## Experimental

Single crystals of Complex 9,  $C_{12}H_{28}N_2O_8Pd$  [dh1-189\_ABS] were [crystallized from water/acetone]. A suitable crystal was selected and [mounted on fiber loop] on a Oxford Diffraction Gemini Ultra diffractometer. The crystal was kept at 100.15 K during data collection. Using Olex2 [1], the structure was solved with the ShelXS-1997 [2] structure solution program using Direct Methods and refined with the ShelXL [3] refinement package using Least Squares minimisation.

1. Dolomanov, O.V., Bourhis, L.J., Gildea, R.J., Howard, J.A.K. & Puschmann, H. (2009), J. Appl. Cryst. 42, 339-341.
2. Sheldrick, G.M. (2008). Acta Cryst. A64, 112-122.
3. Sheldrick, G.M. (2015). Acta Cryst. C71, 3-8.

## Crystal structure determination of [dh1-189\_ABS]

**Crystal Data** for **Complex 9**,  $C_{12}H_{28}N_2O_8Pd$  ( $M = 434.76$  g/mol): monoclinic, space group C2 (no. 5),  $a = 23.0490(7)$  Å,  $b = 7.60778(14)$  Å,  $c = 11.8928(2)$  Å,  $\beta = 123.0605(13)^\circ$ ,  $V = 1747.78(7)$  Å<sup>3</sup>,  $Z = 4$ ,  $T = 100.15$  K,  $\mu(\text{MoK}\alpha) = 1.102$  mm<sup>-1</sup>,  $D_{\text{calc}} = 1.652$  g/cm<sup>3</sup>, 18977 reflections measured ( $7.09^\circ \leq 2\theta \leq 64.8^\circ$ ), 5827 unique ( $R_{\text{int}} = 0.0320$ ,  $R_{\text{sigma}} = 0.0331$ ) which were used in all calculations. The final  $R_1$  was 0.0341 ( $I > 2\sigma(I)$ ) and  $wR_2$  was 0.0888 (all data).

## Refinement model description

Number of restraints - 6, number of constraints - unknown.

Details:

### 1. Fixed Uiso

At 1.2 times of:

All C(H) groups, All C(H,H) groups, All N(H) groups

At 1.5 times of:

All O(H) groups, All O(H,H) groups

### 2. Restrained distances

O6-H6C = O6-H6D

0.9 with sigma of 0.03

### 3.a Free rotating group:

O5(H5C,H5D), O7(H7A,H7B), O8(H8B)

### 3.b Ternary CH refined with riding coordinates:

N1(H1), N2(H2), C2(H2A), C8(H8)

### 3.c Secondary CH2 refined with riding coordinates:

C3(H3A,H3B), C4(H4A,H4B), C5(H5A,H5B), C6(H6A,H6B), C9(H9A,H9B), C10(H10A,H10B), C11(H11A,H11B), C12(H12A,H12B)

This report has been created with Olex2, compiled on 2018.05.29 svn.r3508 for OlexSys. Please [let us know](#) if there are any errors or if you would like to have additional features.
